1  
2  
3  
4  
5  
6  
7  
8  
9  
10  
11  
12  
13  
14  
15  
16  
17  
18  
19  
20  
21  
22  
23  
24  
25  
26

## A novel Mn-dependent peroxidase contributes to tardigrade anhydrobiosis

Yuki Yoshida<sup>1,2</sup>, Tadashi Satoh<sup>3</sup>, Chise Ota<sup>4</sup>, Sae Tanaka<sup>4</sup>, Daiki D. Horikawa<sup>1,2</sup>, Masaru Tomita<sup>1,2</sup>,  
Koichi Kato<sup>3,4</sup>, Kazuharu Arakawa<sup>1,2,4,\*</sup>

<sup>1</sup> Keio University, Institute for Advanced Biosciences, Nipponkoku, 403-1, Daihouji, Tsuruoka,  
Yamagata 997-0017, Japan

<sup>2</sup> Keio University, Graduate School of Media and Governance, Systems Biology Program, 5322  
Endo, Fujisawa, Kanagawa 252-0882, Japan

<sup>3</sup> Faculty and Graduate School of Pharmaceutical Sciences, Nagoya City University, 3-1 Tanabe-  
dori, Mizuho, Nagoya 467-8603, Japan

<sup>4</sup> Exploratory Research Center on Life and Living Systems (ExCELLS), National Institute of  
Natural Sciences, Exploratory Research Center on Life and Living Systems, 5-1 Higashiyama,  
Myodaiji, Okazaki, Aichi 444-8787, Japan

\* Corresponding author

### Author contribution

Conceptualization : YY, AK, KK

Data Curation: YY, TS

Formal Analysis: YY, TS

Funding Acquisition: KK, AK

Investigation: YY, TS, CO, ST, AK

Methodology: YY, DDH, TS, AK

27 Project Administration: AK, KK

28 Resources: MT, AK

29 Supervision: MT, KK, KA

30 Validation: YY, TS

31 Visualization: YY, TS

32 Writing – Original Draft Preparation: YY, TS, AK

33 Writing – Review & Editing : YY, TS, CO, ST, DDH, MT, KK, AK

34

35

### 36 **Keywords:**

37 Tardigrade, Anhydrobiosis, Ultraviolet C, Antioxidative stress

38

### 39 **Competing interest declaration**

40 All authors do not have any competing interests.

41

### 42 **Data availability**

43 The coordinates and structural factors of the crystal structure of the catalytic domain of g12777

44 protein complexed with Mn<sup>2+</sup> or Zn<sup>2+</sup> ions have been deposited in the Protein Data Bank under

45 accession numbers 7DBT and 7DBU, respectively. The RNA-Seq data obtained were deposited to

46 NCBI GEO under the accession ID GSE152753.

47

48

### 49 **Abstract**

50 Tardigrades are microscopic animals that are capable of tolerating extreme environments by entering

51 a desiccated ametabolic state known as anhydrobiosis. While antioxidative stress genes, antiapoptotic

52 pathways and tardigrade-specific intrinsically disordered proteins have been implicated in the

53 anhydrobiotic machinery, conservation of these mechanisms is not universal within the phylum  
54 Tardigrada, suggesting the existence of overlooked components. Here, we show that a novel Mn-  
55 dependent peroxidase is an important factor in tardigrade anhydrobiosis. Through comparative time-  
56 series transcriptome analysis of *Ramazzottius varieornatus* specimens exposed to desiccation or  
57 ultraviolet light, we first identified several novel gene families without similarity to existing  
58 sequences that are induced rapidly after stress exposure. Among these, a single gene family with  
59 multiple orthologs that is highly conserved within the phylum Tardigrada and enhances oxidative  
60 stress tolerance when expressed in human cells was identified. Crystallographic study of this protein  
61 suggested Zn or Mn binding at the active site, and we further confirmed that this protein has Mn-  
62 dependent peroxidase activity *in vitro*. Our results demonstrated novel mechanisms for coping with  
63 oxidative stress that may be a fundamental mechanism of anhydrobiosis in tardigrades. Furthermore,  
64 localization of these sets of proteins in the Golgi apparatus suggests an indispensable role of the Golgi  
65 stress response in desiccation tolerance.

66

## 67 **Introduction**

68 Tardigrades are microscopic animals that are renowned for their ability to enter an  
69 ametabolic state known as cryptobiosis [1] or, more particularly, anhydrobiosis (life without water),  
70 which is cryptobiosis upon almost complete desiccation. Tardigrades can withstand extreme  
71 conditions in this dormant state, including extreme temperature, pressure, high doses of ionizing  
72 radiation, and exposure to the vacuum of space [2-8], yet they quickly resume life upon rehydration.  
73 Anhydrobiosis has been acquired in multiple lineages encompassing all kingdoms of life, but  
74 tardigrades are unique in multi-cellular animals that they can enter anhydrobiosis within minutes[9],  
75 and that the mechanism does not rely on trehalose and LEA proteins [10, 11]. The molecular  
76 machinery of tardigrade anhydrobiosis is beginning to be uncovered due to the availability of genomic  
77 resources [12-14], leading to the identification of several tardigrade-specific genes, such as CAHS,  
78 SAHS, MAHS, LEAM, and Dsup, that have been suggested to play critical roles in cellular protection

79 upon anhydrobiosis [14-16]. Notably, Dsup is a nucleus-localizing DNA-binding protein that is  
80 reported to protect DNA molecules from hydroxyl radicals, where the induction of this single protein  
81 in mammalian cells and plants can increase its radiation tolerance [14, 17-19]. However, these  
82 proteins are not conserved across the phylum Tardigrada (as they are not conserved in the class  
83 Heterotardigrada) [20], and the necessary and sufficient set of genes and pathways enabling  
84 anhydrobiosis remains elusive.

85         Of the many adverse extremities tardigrades can tolerate in anhydrobiosis, radiation is unique  
86 in that tardigrades can better tolerate it in the active hydrated state than in the inactive desiccated  
87 state[21, 22], suggesting the existence of efficient repair pathways in addition to the protective  
88 mechanisms identified thus far. Tolerance to radiation in tardigrades is a cross-tolerance of  
89 anhydrobiosis [23], and the overlapping pathway is presumably the defense against reactive oxygen  
90 species (ROS) that mediates protein oxidation and DNA damage [24, 25]. To this end, we employed  
91 ultraviolet C (UVC), a low-level energy stressor that causes oxidative stress, to screen for tardigrade-  
92 unique components for ROS defense in *Ramazzottius varieornatus*. Tardigrades are capable of  
93 tolerating approximately 1,000-fold higher dosages of ultraviolet B (UVB) and UVC than human cell  
94 lines [6, 26].

95

## 96 **Results**

### 97 **Transcriptome sequencing of UVC exposed *R. varieornatus***

98         Previous studies have observed that *R. varieornatus* exposed to 2.5 kJ/m<sup>2</sup> UVC showed a  
99 prolonged decrease in movement for approximately 1 day, which presumably is the critical period for  
100 the ROS response. We first validated this observation on a finer time scale, where individuals who  
101 were exposed to 2.5 kJ/m<sup>2</sup> showed significantly lower movements from 2-9 hours after exposure (**Fig**  
102 **1A**). We then conducted transcriptome profiling from 0-12 hours and 0-72 hours to screen for genes  
103 induced in this period (**S1 Table**). Initial clustering of expression values using Spearman correlation  
104 indicated that the transcriptome profiles drastically shifted between 3-4- and 24-36-hours post

105 exposure (**S2 Fig**), suggesting consistency with the motility of the animals. We found a total of 3,324  
106 differentially expressed genes following exposure to UVC (DESeq2, FDR<0.05), of which 1,314 and  
107 2,110 genes to be up-regulated and down-regulated, accordingly (**S2 Fig**). Genes with high fold  
108 change (>4) were comprised of various genes, including chaperones (Mitochondrial chaperone  
109 BCS1), DNA damage repair pathways (XRCC4, PARP), metalloproteases (NAS-13), anti-oxidative  
110 pathways (GST), and previously identified tardigrade specific protection-related genes (CAHS,  
111 SAHS). Interestingly, DEGs that had high expression values included several of those with high fold  
112 change, additionally anti-oxidative stress genes thioredoxin and Peroxiredoxin (**S3 Table**, **S4 Table**).  
113 These genes were induced during tardigrade anhydrobiosis [13], suggesting similar pathways are  
114 being regulated between desiccation and UVC exposure. Additionally, we found that the zinc  
115 metalloprotease NAS, apolipoproteins, autophagy-related sequestosome, and the mitochondrial  
116 chaperone BCS1 were highly expressed (TPM>1000) after exposure (**S5 Text**).

117

### 118 **Identification of the g12777 gene family as a novel stress responsive gene family**

119 To screen for genes responsible for the cross-tolerance of anhydrobiosis and UVC exposure,  
120 we analyzed the intersection of DEGs in the above result and our previous differential transcriptome  
121 analysis during slow desiccation. We found 141 genes that were upregulated in both conditions (**S7**  
122 **Table** that were significantly enriched in Gene Ontology terms related to antioxidative stress (*e.g.*,  
123 glutathione transferase activity, superoxide dismutase activity, etc., **S8 Table**), and these genes also  
124 included the previously identified tardigrade-specific heat soluble proteins CAHS and SAHS.  
125 Seventy-five of these genes were hypothetical genes, and only two (g2856/RvY\_14843,  
126 g241/RvY\_00334) contained no known functional domains (Interproscan, CDD, Pfam-A,  
127 Superfamily, SMART, **Fig 1b**, **S9 Text**, **S10 Table**, **S11 Table**). The g241 gene showed similarity  
128 with bacterial genes, and phylogenetic analysis of this gene suggested a possible horizontal gene  
129 transfer event at the early stages of the Tardigrada lineage (**S16 Fig**, **S17 Text**). The remaining g2856  
130 was strongly multiplied within the *R. varieornatus* genome (total of 35 copies), and several of the

131 orthologs were duplicated in tandem (**S21 Table**) and were highly conserved throughout the  
132 Tardigrada phylum, including in nonanhydrobiotic Heterotardigrada species. Phylogenetic analysis  
133 of g2856 orthologs indicated that there are 4 subgroups (**Fig 1c**), where a single subfamily was  
134 comprised of Heterotardigrada species. Within the 35 copies of the g2856 gene family, the g12777  
135 gene was found to have 2.5-fold induction of expression during slow desiccation of *R. varieornatus*.  
136 Additionally, informatics-based analysis predicted a signal peptide and a disordered region in the N-  
137 terminus of this protein (**Fig 1d**), similar to various tardigrade-specific anhydrobiosis-related genes.  
138 These characteristics suggested that this gene may play an important role in tardigrade anhydrobiosis;  
139 therefore, we submitted this g12777 gene for further functional analysis.

140

#### 141 **g12777 has a highly conserved Mn<sup>2+</sup> binding site**

142 We crystallized the putative globular domain that lacked the N-terminus 62 amino acids of  
143 g12777 protein and solved the crystal structures as two forms containing Mn<sup>2+</sup> or Zn<sup>2+</sup> ions at 2.30 Å  
144 and 1.60 Å resolutions, respectively (**Fig 2a, S22abcd Fig, S23 Table, S24 Text**). These  
145 crystallographic data revealed that g12777 protein possesses a β-sandwich domain sharing a common  
146 Mn<sup>2+</sup> and Zn<sup>2+</sup> binding site. In this site, a Mn<sup>2+</sup> ion was coordinated by three aspartic acids with high  
147 electrostatic surface potential (**Fig 2bc**). In the Mn<sup>2+</sup>-binding site located at the negatively charged  
148 patch comprising β1–β2 and β3–β4 loops, the side-chain oxygen atoms of Asp92, Asp98, and Asp131  
149 and the main-chain carbonyl atom of Ala96 and two water molecules coordinate with Mn<sup>2+</sup> ion at  
150 distances of 2.2–2.9 Å (**Fig 2c**). As for the Zn<sup>2+</sup>-binding site located at the almost same region as that  
151 of Mn<sup>2+</sup>, the side-chain oxygen atoms of Asp92, Asp98, Asp161, and Asp163 coordinate with Zn<sup>2+</sup>  
152 ion at distances of 1.9–2.0 Å (**S22d Fig**). Considerable conformational difference was observed  
153 between Mn<sup>2+</sup>- and Zn<sup>2+</sup>-bound forms in terms of the metal-binding site, in which Asp92 and Asp98  
154 were commonly involved in Mn<sup>2+</sup> and Zn<sup>2+</sup> binding (**Fig 2c and S22d Fig**). These aspartic acid  
155 residues were highly conserved within tardigrade orthologs (**S22ef Fig**), and the highly conserved  
156 CD-CD motif containing two Asp residues (D92 and D98, **S22efg Fig**) was used in the metal ion

157 binding in both structures, suggesting the importance of these residues. The cysteine residues in this  
158 motif formed a disulfide bond in the crystal structure, suggesting that this disulfide bond may also  
159 contribute to this protein's function. We also observed another region that was highly conserved  
160 (W194 and R216, **S22ef Fig**), suggesting that another functional site may be present.

161 ITC experiment demonstrated that the estimated dissociation constants of catalytic domain  
162 of g12777 and  $Zn^{2+}$ ,  $Mn^{2+}$ , and  $Ca^{2+}$  were  $1.92 \times 10^{-6} \pm 6.00 \times 10^{-8}$  M,  $2.42 \times 10^{-5} \pm 1.75 \times 10^{-6}$  M, or  
163  $1.39 \times 10^{-4} \pm 3.02 \times 10^{-5}$  M, respectively, indicating that the binding affinity of  $Zn^{2+}$  was the highest  
164 among these divalent cations (**Fig 2d, S22g Fig, S25 Table**). Importantly, the binding stoichiometry  
165 ( $n$ ) of  $Zn^{2+}$ ,  $Mn^{2+}$ , and  $Ca^{2+}$  were  $1.00 \pm 0.00$ ,  $0.77 \pm 0.02$ , and  $0.80 \pm 0.17$ , indicating that catalytic  
166 domain of g12777 binds to the one metal ions in solution (**Fig 2d, S22g Fig, S25 Table**).

167

#### 168 **g12777 is a $Mn^{2+}$ dependent peroxidase**

169 To validate where this protein functions in cultured cells, we constructed a GFP-tagged  
170 recombinant g12777 protein in the pAcGFP1-N1 plasmid and expressed these proteins in the  
171 HEK293 cell line. Costaining with DAPI and CellLight GolgiRFP suggested that this protein  
172 localizes in the Golgi apparatus (**Fig 3a**). Six of the most highly expressed orthologs of the g12777  
173 family of proteins (highly expressed in the UVC time course and differentially expressed during slow-  
174 dry anhydrobiosis) also showed Golgi localization (**S26 Fig**). To validate this protein's antioxidative  
175 stress functions, we subjected cells expressing GFP-tagged g12777 proteins to hydrogen peroxide  
176 ( $H_2O_2$ ) exposure. The transfected cells showed increased survival at 0.2-0.3 mM  $H_2O_2$  as measured  
177 by MTT assays (**Fig 3b**). Similar results were obtained (0.1-0.2 mM  $H_2O_2$ ) by flow cytometry  
178 measurements (Annexin V-negative + SYTOX Blue-negative cells, **Fig 3c**). Substitution of the Asp  
179 residues comprising Zn-1 to alanine (AMNP-D2A) showed a decrease in cell survival (**Fig 3bc**),  
180 indicating that this Mn-1 binding site is required for antioxidative stress function. We then assayed  
181 whether recombinant proteins also have an antioxidative stress function. Recombinant  $\beta$ -sandwich  
182 domain of g12777 protein showed significant peroxidase activity when  $Mn^{2+}$  ions but not  $Zn^{2+}$  ions

183 were present (**Fig 3d**). The peroxidase activity of AMNP in Mn<sup>2+</sup> conditions were 1/20 of that of  
184 bovine liver catalase (**S27 Fig**). Removal of the signal peptide and disorder region did not  
185 significantly reduce tolerance against oxidative stress (**Fig 3bc**), suggesting that the disordered region  
186 does not directly contribute to the anti-oxidative stress function.

187

## 188 **Discussion**

189 These findings suggest that this protein is a manganese-dependent peroxidase, independent of  
190 other components of the cell. Hence, we named this gene family Anhydrobiosis-related Mn-  
191 dependent Peroxidase (AMNP). We hypothesize that the presence of Mn-1 and the disulfide bond at  
192 the active site is suggestive of the utilization of both mechanisms for peroxidase activity, which could  
193 categorize AMNP as a new class of peroxidase. Constructs lacking the disordered region showed  
194 anti-oxidative stress functions. Intrinsically disordered proteins (IDP) are implied to contribute to  
195 cellular tolerance in Tardigrades [15, 16] and Drosophila [27]. IDPs have been proposed to participate  
196 in protein stability [28], therefore we hypothesize this disordered region may contribute to protein  
197 stability of AMNP proteins. We have also observed that the AMNP gene utilizes Mn<sup>2+</sup> ions for  
198 peroxidase function, while it has a higher affinity for Zn<sup>2+</sup> ions. We speculate that this affinity is  
199 related to the localization of this protein in the Golgi apparatus, since the Golgi apparatus has a strictly  
200 controlled high manganese concentration [29-32], suggesting the antioxidative stress functionality in  
201 the Golgi seems to be crucial for anhydrobiotic survival. The importance of the Golgi apparatus in  
202 stress response and regulation has been studied [33-35], but its contribution to anhydrobiosis has not  
203 been discussed in detail to date. We believe that the results of this work can be a starting point for a  
204 more comprehensive study of the intracellular mechanisms of anhydrobiosis.

205 In conclusion, our results provide a global image of the transcriptomic response against UVC  
206 in an extremophile tardigrade and showed that the oxidative stress response partly comprised of the  
207 novel Mn-dependent peroxidase family AMNP is one of the central mechanisms in tardigrade  
208 anhydrobiosis. Moreover, AMNP is the first tardigrade-specific anhydrobiosis-related gene that is



209 conserved throughout the phylum, in contrast to previously identified tardigrade-specific elements  
210 that are conserved in only Eutardigrada at most. This finding underlies a fundamental basis of the  
211 cellular protection against oxidative stress during anhydrobiosis and the contribution of the Golgi  
212 apparatus.

213

## 214 **Materials and Methods**

### 215 **Tardigrade culture and UVC Exposure**

216 In this study, we used the *Ramazzottius varieornatus* strain YOKOZUNA-1. The animals  
217 were reared in an environment established by our previous study[21] and were maintained in 90 mm  
218 petri dish plates. Approximately 600 animals were placed on 2.0% bacto-agar layered dishes and fed  
219 with *Chlorella vulgaris* mixed in Volvic water. The petri dish plates were lidded and placed in a dark  
220 incubator, set at 22 °C. The animals were transferred to new plates every 7 days.

221 Irradiation of the tardigrades was conducted using the UVC lamp of a drying rack (ASONE)  
222 following the protocol in our previous study[6]. Tardigrades were set on a volvic gel layered in a  
223 plastic plate, and excess water was removed. This procedure does not induce anhydrobiosis and is  
224 required to minimize UVC absorbance by the layer of water. The plates were then set for exposure to  
225 UV-C by a UVC lamp. The average dosage was 0.54 mW/cm<sup>2</sup> (0.0054 kJ/m<sup>2</sup>), quantified by UV  
226 intensity meter (Fuso, YK-37UVSD). Water was added to the plates immediately after irradiation  
227 and set to incubate in a dark chamber set at 22°C until sampling.

228

### 229 **Quantification of movement in irradiated samples**

230 10 individuals were exposed to 2.5kJ/m<sup>2</sup> of UVC radiation and were placed into a single  
231 well of the 6x12 plate supplied with 2 µL of 2% agar gel. 5 replicates were prepared for UVC exposed  
232 and control individuals. A 30 second movie was taken at 0, 1, 2, 3, 6, 9, 12, 18, 24, 36, 48, 72 hours  
233 after exposure for each individual with VHX-5000 (Keyence). An individual was classified as moving  
234 if any movement was observed within this thirty-second time frame. The quantified movement was

235 statistically compared with a non-irradiated control group by ANOVA and Tukey HSD in R.  
236 Conditions with FDR < 0.05 were classified as significant changes.

237

### 238 **RNA extraction and Library Preparation**

239 We conducted RNA-Seq on two time-courses with three biological replicates, the first 0-12 hours  
240 post exposure (1h, 2h, 3h, 4h, 5h, 6h, 9h, 12h), designated “Short”, and the second 0-72 hours post  
241 exposure (0h, 12h, 24h, 36h, 48h, 72h), designated “Long”. Non-exposed individuals were sampled  
242 at 0 hours without UVC exposure. With each sampling, tardigrades were immersed in 100µL of Trizol  
243 reagent in a PCR tube (30 animals per sample) and preserved at -80°C. Biomasher II (Nippi. Inc.)  
244 was used for the homogenization of tardigrades and 200 µL of TRIzol reagent (ThermoFisher  
245 Scientific) was added to the preservation PCR tube for total RNA extraction with Direct-zol  
246 (Funakoshi). Total RNA was submitted to mRNA Isolation and RNA fragmentation with NEBNext  
247 Oligo d(T)25 beads (NEW ENGLAND BioLabs) and cDNA synthesis, adapter ligation and PCR  
248 enrichment with NEBNext Ultra RNA Library Prep Kit (NEW ENGLAND BioLabs). RNA and  
249 cDNA concentrations were determined using Qubit RNA/DNA (ThermoFisher Scientific), and  
250 electrophoresis of the synthesized library was conducted with TapeStation D1000 tape (Agilent).  
251 After pooling all of the samples (70 ng of cDNA per sample), the library was size-selected for  
252 fragments between 300-1000bp with an E-Gel EX 1% (ThermoFisher Scientific) and Nucleospin Gel  
253 and PCR Clean-up (Takara). The sequencing library was sequenced with the Illumina Next-Seq 500  
254 instrument (Illumina) with 75 bp single end settings.

255

### 256 **Informatics analysis**

257 Prior to informatics analysis, preparation of sequenced reads was conducted. After de-  
258 multiplexing sequenced raw files with bcl2fastq (Illumina), quality was checked with FastQC[36].  
259 We then used Kallisto[37] (v0.44.0, -boot 1000, --bias) to quantify gene expression, using the *R.*  
260 *varieornatus* genome[13, 14]. To determine differentially expressed genes (DEGs), we mapped the

261 RNA-Seq reads to the coding sequences with BWA MEM (v0.7.12-r1039) and conducted statistical  
262 test with DESeq2 (v1.22.2)[38, 39]. Genes with FDR below 0.05 and fold change over 2 were  
263 determined as DEGs. The expression profiles were validated using Spearman correlation in between  
264 samples and clustering. DEGs of slow-dried *R. varieornatus* anhydrobiotic samples were obtained  
265 from our previous study[13], and differentially expressed genes in both conditions were obtained.

266 For the identification of g12777 and g241 orthologs, we first prepared published  
267 transcriptomes and our in-house tardigrade genome database (Arakawa, Personal communication).  
268 We obtained transcriptome assemblies of *Richteria coronifer* and *Echiniscoides sigismundi* from  
269 previous studies[20]. Additionally, we re-assembled each transcriptome using Bridger[40] (v2014-  
270 12-01, *Richteria coronifer* : SRR7340056, *Echiniscoides sigismundi* : SRR7309271, default  
271 parameters). Each tardigrade genome/transcriptome was submitted to BUSCO genome  
272 completeness validation against the eukaryote lineage[41]. The gene model obtained during this  
273 assessment was used with autoAugPred.pl script in the Augustus (v3.3.3) package to predict genes in  
274 each genome[42]. The amino acid sequences of each genome were submitted to a TBLASTX or  
275 BLASTP search (v2.2.2)[43] of g12777.t1 and g241.t1 coding sequences and amino acid sequences  
276 to obtain orthologs in each species. Additionally, the g241 amino acid sequence was submitted to a  
277 Diamond BLASTP (v0.9.24.125) search against NCBI NR and NCBI Bacteria RefSeq to obtain  
278 bacterial orthologs[44, 45]. Furthermore, we submitted predicted proteome sequences for each  
279 tardigrade species and additional metazoan species used in our previous study[13] to OrthoFinder  
280 (v2.3.7, --mcl-I 2.0) to validate our BLASTP search results[46]. For g12777.t1 orthologs, amino acid  
281 sequences were subjected to MAFFT (v7.271, --auto) multiple sequence alignment and phylogenetic  
282 tree construction by FastTree (v2.1.8 SSE3, --b1000, -gamma)[47, 48], which was visualized in  
283 iTOL[49]. Orthologs were also submitted to MEME analysis (v5.1.0) for a novel motif search[50].  
284 G-language Genome Analysis Environment (v1.9.1) was used for data manipulation[51, 52].

285

## 286 **Transmission electron microscope observation**

287 Anhydrobiosis was induced by placing *R. varieornatus* in 37% RH and 0% RH for 24 hours  
288 each following our previous study[13]. Sample preparation and TEM imaging was conducted at Tokai  
289 Electronic Microscope Analysis. Samples were sandwiched between copper disks and rapidly frozen  
290 in liquid propane at -175°C. Frozen samples were freeze-substituted with 2% glutaraldehyde, 1%  
291 tannic acid in ethanol and 2% distilled water at -80°C for 2 days, -20°C for 3h, and 4°C for 4h. For  
292 dehydration, samples were incubated in ethanol for 30 minutes three times, and overnight at room  
293 temperature. These samples were infiltrated with propylene oxide (PO) twice for 30 minutes each  
294 and were put into a 70:30 mixture of PO and resin (Quetol-812; Nisshin EM Co., Tokyo, Japan) for  
295 1h. PO was volatilized by keeping the tube cap open overnight. These samples were further  
296 transferred to fresh 100% resin and polymerized at 60°C for 48 hours before being ultra-thin sectioned  
297 at 70nm with a diamond knife using a ultramicrotome (ULTRACUT, UCT, Leica), after which  
298 sections were placed on copper grids. Sections were stained with 2 % uranyl acetate at room-  
299 temperature for 15 minutes and rinsed with distilled water. The sections were further secondary-  
300 stained with Lead stain solution (Sigma-Aldrich Co.) at room temperature for 3 minutes. The grids  
301 were observed under a transmission electron microscope (JEM-400Plus<sup>l</sup> JEOL Ltd., Tokyo, Japan)  
302 at an acceleration voltage of 100kV. Digital images (3296 x 2472 pixels) were taken with a CCD  
303 camera (EM-14830RUBY2; JEOL, Ltd., Tokyo, Japan). The images were analyzed for mitochondrial  
304 size using ImageJ and area and circularity values were tested with ANOVA and Tukey HSD in R.

305

## 306 **Sample preparation of recombinant proteins**

307 For biochemical and biophysical characterizations of the g12777 protein with deletions of  
308 the N-terminal signal sequence and putative intrinsically disordered region, the gene encoding  
309 residues Gly63–Leu231 were cloned into the NdeI and EcoRI sites of the pET-28b vector (Novagen  
310 - Merck Millipore). *Escherichia coli* BL21-CodonPlus(DE3) harboring the plasmids were cultured in  
311 LB medium containing 15 µg/ml kanamycin and subsequently harvested after induction with 0.5 mM

312 isopropyl  $\beta$ -D-thiogalactoside for 4 h at 37 °C. The harvested cells were resuspended with a buffer A  
313 [20 mM Tris-HCl (pH 8.0), 150 mM NaCl, and 1 mM EDTA] and lysed by sonication. The insoluble  
314 inclusion bodies were extensively washed with buffer A in the presence and absence of 2% Triton X-  
315 100, and then solubilized with 6 M guanidinium chloride, 50 mM Tris-HCl (pH 8.0), and 0.5 mM  
316 dithiothreitol. The solubilized proteins were refolded by dilution (0.05 mg/mL) in 50 mM Tris-HCl  
317 (pH 8.0), 400 mM L-arginine, 5 mM reduced glutathione, 0.5 mM oxidized glutathione, and 2 mM  
318  $\text{CaCl}_2$  at 4°C for 12 h. The refolded protein was concentrated and then dialyzed against 20 mM Tris-  
319 HCl (pH 8.0), 150 mM NaCl, and 2 mM  $\text{CaCl}_2$ . Subsequently, the N-terminal His6-tag peptide was  
320 removed by thrombin digestion. The nontagged proteins were incubated at 4°C for 30 min in the  
321 presence of 10 mM EDTA and 0.1 mM AEBSF [4-(2-Aminoethyl)benzenesulfonyl fluoride  
322 hydrochloride], and further purified with a HiLoad Superdex 75 pg (GE Healthcare) equilibrated with  
323 buffer A.

324

### 325 **Crystallization, X-ray data collection and structure determination**

326 The catalytic domain of g12777 protein (10 mg/mL) was dissolved in 20 mM Tris-HCl (pH  
327 8.0), 150 mM NaCl and 2 mM  $\text{CaCl}_2$ . The crystals of  $\text{Zn}^{2+}$ -bound g12777 protein complex were  
328 obtained in a precipitant containing 10% PEG3350, 100 mM imidazole-HCl buffer (pH 7.5), 300 mM  
329 zinc acetate, and 50 mM sodium fluoride upon incubation at 20 °C for 3 days. In contrast, the crystals  
330 of  $\text{Mn}^{2+}$ -bound complex were obtained by a soaking with a buffer containing 11% PEG3350, 100  
331 mM imidazole-HCl buffer (pH 7.5), 50 mM manganese chloride, and 50 mM sodium fluoride for 5  
332 h using the  $\text{Zn}^{2+}$ -bound crystals. The crystals were cryoprotected with the crystallization or soaking  
333 buffer supplemented with 20% glycerol. Th crystals of  $\text{Zn}^{2+}$ - and  $\text{Mn}^{2+}$ -bound g12777 protein  
334 complexes belonged to space groups  $P1$  and  $P2_1$  with two g12777 protein molecules per asymmetric  
335 unit and diffracted up to resolutions of 1.60 Å and 2.30 Å, respectively. Diffraction data were scaled  
336 and integrated using XDS (GPLv2)[53] and AIMLESS (ver. 1.12.1)[54].

337           The crystal structure of the catalytic domain of the g12777 protein crystallized in the  
338 presence of excess amount of  $Zn^{2+}$  ion (300 mM) was solved by the single-wavelength anomalous  
339 dispersion (SAD) method using 1.1200 Å wavelength (Aichi-SR BL2S1, Japan) with the program  
340 Autosol in the Phenix suite (ver. 1.11.1-2575) [55]. As for the  $Mn^{2+}$ -bound g12777 protein complex,  
341 the crystal structure was solved by the molecular replacement method using the  $Zn^{2+}$ -bound structure  
342 as a search model. The diffraction data set was collected at Osaka University using BL44XU beamline  
343 at SPring-8 (Japan). Automated model building and manual model fitting to the electron density  
344 maps were performed using ARP/wARP (ver. 8.0)[56] and COOT (ver. 0.9)[57], respectively.  
345 REFMAC5 (ver. 5.8.0258)[58] was used to refine the crystal structure, and the stereochemical quality  
346 of the final models were validated using MolProbity (ver. 4.2)[59], showing that no amino acids were  
347 located in the disallowed regions of the Ramachandran plot. The final model of the  $Zn^{2+}$ -bound  
348 g12777 protein complexes had  $R_{work}$  of 19.2 and  $R_{free}$  of 24.5%, whereas that of  $Mn^{2+}$ -bound form  
349 had  $R_{work}$  of 26.2 and  $R_{free}$  of 32.5% (**Supplementary Table S2**). The molecular graphics were  
350 prepared using PyMOL (ver. 2.4.0a0, <https://pymol.org/2/>). These structures were compared with  
351 known protein structures using the DALI server [60]

352

### 353 **Measurement of enzymatic activity of the g12777 protein**

354           The catalase/oxidase activities of the g12777 protein were measured using Cayman  
355 Catalase Assay Kit (Cayman Chemical, USA) following the manufacturer's protocol. For the  
356 enzymatic assay, 20 ng of the wild-type g12777 protein catalytic domain was incubated in the  
357 presence and absence of 2 mM  $ZnCl_2$  and  $MnCl_2$  for 30 min at 25 °C. Bovine liver catalase (Sigma  
358 Aldrich) was used as a positive control. Catalase/oxidase activity were tested with ANOVA and  
359 Tukey HSD in R.

360

## 361 **Isothermal titration calorimetry**

362 Purified catalytic domain of the g12777 protein dissolved in 20 mM Bis-Tris-HCl (pH 6.5)  
363 containing 150 mM NaCl was used for isothermal titration calorimetry (ITC). In this experiment, a  
364 syringe containing 1 mM ZnCl<sub>2</sub>, MnCl<sub>2</sub> or CaCl<sub>2</sub> was titrated into a sample cell containing 0.1 mM  
365 catalytic domain of the g12777 protein using an iTC200 calorimeter (GE Healthcare).

366

## 367 **Expression of GFP-tagged g12777 in HEK293**

368 For expression of GFP-fused g12777 proteins, we inserted the coding sequence between  
369 the *SalI* and *BamHI* restriction sites of the pAcGFP1-N1 plasmid (Takara). The total RNA was  
370 extracted from *R. varieornatus* with Direct-zol Ultra RNA (Funakoshi) and was reverse transcribed  
371 with PrimeScript Reverse Transcriptase (Takara). g12777 mRNA was selected by PCR using Tks  
372 Gflex DNA Polymerase (Takara) with the following primers:

373 g12777-F: 5'-ATTGTCGACATGGCATTATCTTTGTGGATGACTG-3',

374 g12777-R: 5'-TAAGGATCCTTTAGGGAAGAAGGTGCCCGACAG-3'.

375 For construction of  $\Delta$ 62aa construct, the forward primer was changed to 5'-  
376 ATTGTCGACGGCCGCTTTGCCGATTTCTTCAGAA-3'. The corresponding g12777-D2A  
377 (D92A, D98A, D161A, D163A mutations, AMNP-D2A) coding sequences were adapted for human  
378 codon usage and synthesized at Eurofin Genomics. g12777-D2A was inserted into the pAcGFP1-N1  
379 plasmid (Takara) between and *SalI-BamHI*. Constructs were transfected into HEK293 cells with the  
380 X-tremeGENE 9 reagent (Sigma-Aldrich) and submitted to selection with G418 (Sigma-Aldrich) at  
381 400  $\mu$ g/mL for more than two weeks, and further passaged at 100  $\mu$ g/mL. HEK293 cell lines were  
382 cultured with MEM medium (Sigma-Aldrich) supplied with FBS (Funakoshi), NEAA (ThermoFisher  
383 Scientific) and Antibiotic-Antimycotic Mixed Stock Solution (Nacalai) and were passaged every 3-4  
384 days with TryPLE (ThermoFisher Scientific). For microscopy observations, cells were fixed with 4%  
385 Paraformaldehyde (Wako), and co-stained with 300 nM DAPI (ThermoFisher Scientific) and 20  $\mu$ L  
386 of CellLight Golgi RFP, BacMan 2.0 (ThermoFisher Scientific) to visualize the nucleus and Golgi

387 apparatus, respectively. Fluorescent signals were observed under the SZ-5000 (Keyence) at 40x or  
388 100x magnification.

389 Additionally, the localization of six high expressed AMNP orthologs were validated using  
390 similar methods. cDNA was obtained from *R. varieornatus* with RNeasy Mini Kit (Qiagen) and  
391 PrimeScript II 1st strand cDNA Synthesis Kit (Takara). The coding sequences of the corresponding  
392 genes were amplified by PrimeSTAR Max DNA Polymerase (Takara) using the following primers:

393 g243-F: 5'-ATTCTGCAGTCGACGGTATGCAGGATGTTTCCGA-3',

394 g243-R: 5'-catgaccggtggatcCTATTTGGTGAACCATCCG-3',

395 g244-F: 5'-ATTCTGCAGTCGACGATGGCCAAGGCGGCAATC-3',

396 g244-R: 5'-catgaccggtggatcTCATCTAGAGAAAAGTCCGC-3',

397 g245-F: 5'-ATTCTGCAGTCGACGGTATGAACTTTCTCTGCTGG-3',

398 g245-R: 5'-catgaccggtggatcTCAGGAGAACATGCCCGA-3',

399 g246-F: 5'-ATTCTGCAGTCGACGATGATGCAGCTGACAATCTT-3',

400 g246-R: 5'-catgaccggtggatcTTATGAGAACATGCCGTCG-3',

401 g779-F: 5'-ATTCTGCAGTCGACGGTATGGATCTGGACAGGG-3',

402 g779-R: 5'-catgaccggtggatcTCATTTTCCAATAAAGGGAATG-3',

403 g2856-F: 5'-ATTCTGCAGTCGACGGTATGTGGGGAATACTGTG-3',

404 g2856-R: 5'-catgaccggtggatcTCATGCCATAGCGTGGCG-3',

405 g12777-F: 5'-ATTCTGCAGTCGACGGTATGGCATTATCTTTGTGG-3',

406 g12777-R: 5'-catgaccggtggatcTTATAGGGAAGAAGGTGCC-3',

407 These coding sequences were inserted into the pAcGFP1-N1 plasmid by In-Fusion HD Cloning Kit.

408 Constructs were transfected into HEK293 cells with the X-tremeGENE 9 reagent (Sigma-Aldrich) in

409 optiMEM solution for 4 hours. After incubation for 24-48 hours in MEM medium, cells were co-

410 stained with Hoechst33342 (ThermoFisher Scientific) and CellLight Golgi-RFP (ThermoFisher

411 Scientific) and observed under the Leica SP8 microscope with x100 magnification.

412



### 413 **Validation of cellular tolerance against oxidative stress**

414 To evaluate cellular tolerance of AMNP transfected cells, we conducted MTT analysis of  
415 H<sub>2</sub>O<sub>2</sub> exposed cell lines expressing only GFP, g12777, g12777-Δ62aa, and g12777-D2A (3 technical  
416 replicates). In brief, approximately 10,000 cells were plated into 96 well plates and were incubated  
417 at 37°C 5% CO<sub>2</sub> for 24 hours. Cells were exposed to 0-1.0 mM H<sub>2</sub>O<sub>2</sub> (Wako) for 30 minutes (3-5  
418 replicates). The culture medium was removed to stop exposure, and 100 μL MEM medium was added  
419 to the wells and further incubated for 24 hours. The culture medium was replaced with 100 μL fresh  
420 culture medium supplied with 10 μL of 5 μg/μL Thiazolyl Blue Tetrazolium Bromide (Sigma-  
421 Aldrich) and incubated for 2 hours for formazan formation. The culture medium was removed, and  
422 100 μL DMSO (Wako) was added to melt the formazan. The 96 well plate was measured with 570  
423 nm and 670 nm using SPECTRAmax PLus384 (Molecular Devices). Three technical replicates were  
424 measured. Absorbance values were calculated by Ab570 – Ab670 – Ab-BLANK. Absorbance values  
425 were statistically tested with ANOVA and Tukey HSD in the R program.

426 For MACS flow cytometry, cells were cultured and exposed to H<sub>2</sub>O<sub>2</sub> similar to the MTT  
427 assay protocol. After 24-hour incubation after exposure, the MEM medium (100 μL) was moved to  
428 a clean well and each well was washed with 100 μL PBS (-). All of the PBS was moved to the  
429 corresponding well. 50 μL TryPLE was added for trypsinization and incubated at 37°C in the CO<sub>2</sub>  
430 incubator for 4 minutes. The MEM culture and PBS mixture were moved to their original wells and  
431 mixed thoroughly to release the cells. The 96 well plate was centrifuged at 2,000 rpm (750g) for 6  
432 minutes at 4°C, and the supernatant was removed. Each well was washed with 1x Annexin binding  
433 buffer (ThermoFisher Scientific), and was centrifuged at 2,000 rpm (750g) for 6 minutes at 4°C. The  
434 buffer was removed, and each well was supplied with 100 μL of Annexin binding buffer supplied  
435 with 0.1 μL SYTOX™ Blue Nucleic Acid Stain (ThermoFisher Scientific) and 2 μL Annexin V  
436 Alexa Fluor 657 (ThermoFisher Scientific). The cells were resuspended with pipetting and set to stain  
437 for 10 minutes on ice. The MACS Quant10 instrument (Miltenyi Biotec) was set for measurement of  
438 DAPI, Alexa 657 and GFP. Three technical replicates were measured. Approximately 100-1500 cells

439 were measured for each cell line. The ratio of healthy cells (Anninx-V (-) SYTOX blue (-) cells) were  
440 compared with ANOVA and Tukey HSD in the R program. Adjusted p-values (FDR) below 0.05  
441 were designated as significant differences.

442

## 443 **Acknowledgments**

444 We thank Nozomi Abe and Naoko Ishii for tardigrade sample preparation. We also thank Yuki Takai,  
445 Dr. Akio Kanai, Fumie Nakasuka, Dr. Shojiro Kitajima and Dr. Sho Tabata (Keio University IAB)  
446 for their advice on the experiments. We acknowledge Dr. Maho Yagi-Utsumi (ExCELLS) for her  
447 useful discussion. We thank Kumiko Hattori (Nagoya City University) for their help in the  
448 preparation of recombinant proteins. We also thank Dr. James Fleming (Keio University IAB) for  
449 proofreading the manuscript. The diffraction data set were collected at Nagoya University using the  
450 BL2S1 beamline at Aichi Synchrotron Radiation Center (Japan) and Osaka University using  
451 BL44XU beamline at SPring-8 (Japan). We thank the beamline staff for providing the data collection  
452 facilities and support. We acknowledge the assistance of the Research Equipment Sharing Center at  
453 Nagoya City University for ITC measurement. This work is supported by KAKENHI Grant-in-Aid  
454 for Scientific Research (B) and Grant-in-Aid for JSPS Fellows from the Japan Society for the  
455 Promotion of Science (JSPS, grant no. JP18J21155, 17H03620), Joint Research by Exploratory  
456 Research Center on Life and Living Systems (ExCELLS program No. 19-208 and 19-501) and partly  
457 by research funds from the Yamagata Prefectural Government and Tsuruoka City, Japan. *C. vulgaris*  
458 used to feed the tardigrades was provided courtesy of Cholorela Industry.

459

## 460 **References**

- 461 1. Keilin D. The problem of anabiosis or latent life: history and current concept. Proc R Soc  
462 Lond B Biol Sci. 1959;150(939):149-91. Epub 1959/03/17. doi: 10.1098/rspb.1959.0013. PubMed  
463 PMID: 13633975.
- 464 2. Beltran-Pardo E, Jonsson KI, Harms-Ringdahl M, Haghdoost S, Wojcik A. Tolerance to

- 465 Gamma Radiation in the Tardigrade *Hypsibius dujardini* from Embryo to Adult Correlate Inversely  
466 with Cellular Proliferation. PLoS One. 2015;10(7):e0133658. Epub 2015/07/25. doi:  
467 10.1371/journal.pone.0133658. PubMed PMID: 26208275; PubMed Central PMCID:  
468 PMCPMC4514856.
- 469 3. Heidemann NWT, Smith DK, Hygum TL, Stapane L, Clausen LKB, Jørgensen A, et al.  
470 Osmotic stress tolerance in semi-terrestrial tardigrades. Zool J Linn Soc. 2016;178(4):912-8. doi:  
471 10.1111/zoj.12502.
- 472 4. Hengherr S, Worland MR, Reuner A, Brummer F, Schill RO. Freeze tolerance, supercooling  
473 points and ice formation: comparative studies on the subzero temperature survival of limno-  
474 terrestrial tardigrades. J Exp Biol. 2009;212(Pt 6):802-7. doi: 10.1242/jeb.025973. PubMed PMID:  
475 19251996.
- 476 5. Hengherr S, Worland MR, Reuner A, Brummer F, Schill RO. High-temperature tolerance in  
477 anhydrobiotic tardigrades is limited by glass transition. Physiol Biochem Zool. 2009;82(6):749-55.  
478 doi: 10.1086/605954. PubMed PMID: 19732016.
- 479 6. Horikawa DD, Cumbers J, Sakakibara I, Rogoff D, Leuko S, Harnoto R, et al. Analysis of  
480 DNA repair and protection in the Tardigrade *Ramazzottius varieornatus* and *Hypsibius dujardini*  
481 after exposure to UVC radiation. PLoS One. 2013;8(6):e64793. doi: 10.1371/journal.pone.0064793.  
482 PubMed PMID: 23762256; PubMed Central PMCID: PMCPMC3675078.
- 483 7. Jonsson KI, Rabbow E, Schill RO, Harms-Ringdahl M, Rettberg P. Tardigrades survive  
484 exposure to space in low Earth orbit. Curr Biol. 2008;18(17):R729-R31. Epub 2008/09/13. doi:  
485 10.1016/j.cub.2008.06.048. PubMed PMID: 18786368.
- 486 8. Ono F, Mori Y, Takarabe K, Fujii A, Saigusa M, Matsushima Y, et al. Effect of ultra-high  
487 pressure on small animals, tardigrades and Artemia. Cogent Physics. 2016;3(1):1167575. doi:  
488 10.1080/23311940.2016.1167575.
- 489 9. Wright JC. Cryptobiosis 300 years on from van Leuwenhoek: What have we learned about  
490 tardigrades? Zoologischer Anzeiger. 2001;240(3-4):563-82.

- 491 10. Sakurai M, Furuki T, Akao K, Tanaka D, Nakahara Y, Kikawada T, et al. Vitrification is  
492 essential for anhydrobiosis in an African chironomid, *Polypedilum vanderplanki*. *Proc Natl Acad*  
493 *Sci U S A*. 2008;105(13):5093-8. doi: 10.1073/pnas.0706197105. PubMed PMID: 18362351;  
494 PubMed Central PMCID: PMCPMC2278217.
- 495 11. Banton MC, Tunnacliffe A. MAPK phosphorylation is implicated in the adaptation to  
496 desiccation stress in nematodes. *J Exp Biol*. 2012;215(Pt 24):4288-98. doi: 10.1242/jeb.074799.  
497 PubMed PMID: 22972886.
- 498 12. Koutsovoulos G, Kumar S, Laetsch DR, Stevens L, Daub J, Conlon C, et al. No evidence for  
499 extensive horizontal gene transfer in the genome of the tardigrade *Hypsibius dujardini*. *Proc Natl*  
500 *Acad Sci U S A*. 2016;113(18):5053-8. doi: 10.1073/pnas.1600338113. PubMed PMID: 27035985;  
501 PubMed Central PMCID: PMCPMC4983863.
- 502 13. Yoshida Y, Koutsovoulos G, Laetsch DR, Stevens L, Kumar S, Horikawa DD, et al.  
503 Comparative genomics of the tardigrades *Hypsibius dujardini* and *Ramazzottius varieornatus*. *PLoS*  
504 *Biol*. 2017;15(7):e2002266. Epub 2017/07/28. doi: 10.1371/journal.pbio.2002266. PubMed PMID:  
505 28749982; PubMed Central PMCID: PMCPMC5531438.
- 506 14. Hashimoto T, Horikawa DD, Saito Y, Kuwahara H, Kozuka-Hata H, Shin IT, et al.  
507 Extremotolerant tardigrade genome and improved radiotolerance of human cultured cells by  
508 tardigrade-unique protein. *Nat Commun*. 2016;7:12808. Epub 2016/09/21. doi:  
509 10.1038/ncomms12808. PubMed PMID: 27649274; PubMed Central PMCID: PMCPMC5034306  
510 described in this publication has been applied for a patent (Japanese patent application number  
511 2015-032209). All other authors declare no competing financial interests.
- 512 15. Yamaguchi A, Tanaka S, Yamaguchi S, Kuwahara H, Takamura C, Imajoh-Ohmi S, et al.  
513 Two novel heat-soluble protein families abundantly expressed in an anhydrobiotic tardigrade. *PLoS*  
514 *One*. 2012;7(8):e44209. Epub 2012/09/01. doi: 10.1371/journal.pone.0044209. PubMed PMID:  
515 22937162; PubMed Central PMCID: PMCPMC3429414.
- 516 16. Tanaka S, Tanaka J, Miwa Y, Horikawa DD, Katayama T, Arakawa K, et al. Novel

- 517 mitochondria-targeted heat-soluble proteins identified in the anhydrobiotic Tardigrade improve  
518 osmotic tolerance of human cells. PLoS One. 2015;10(2):e0118272. Epub 2015/02/13. doi:  
519 10.1371/journal.pone.0118272. PubMed PMID: 25675104; PubMed Central PMCID:  
520 PMCPMC4326354.
- 521 17. Chavez C, Cruz-Becerra G, Fei J, Kassavetis GA, Kadonaga JT. The tardigrade damage  
522 suppressor protein binds to nucleosomes and protects DNA from hydroxyl radicals. Elife. 2019;8.  
523 doi: 10.7554/eLife.47682. PubMed PMID: 31571581.
- 524 18. Minguez-Toral M, Cuevas-Zuviria B, Garrido-Arandia M, Pacios LF. A computational  
525 structural study on the DNA-protecting role of the tardigrade-unique Dsup protein. Sci Rep.  
526 2020;10(1):13424. Epub 2020/08/10. doi: 10.1038/s41598-020-70431-1. PubMed PMID:  
527 32770133; PubMed Central PMCID: PMCPMC7414916.
- 528 19. Kirke J, Jin XL, Zhang XH. Expression of a Tardigrade Dsup Gene Enhances Genome  
529 Protection in Plants. Mol Biotechnol. 2020. Epub 2020/09/22. doi: 10.1007/s12033-020-00273-9.  
530 PubMed PMID: 32955680.
- 531 20. Kamilari M, Jorgensen A, Schiott M, Mobjerg N. Comparative transcriptomics suggest  
532 unique molecular adaptations within tardigrade lineages. BMC Genomics. 2019;20(1):607. doi:  
533 10.1186/s12864-019-5912-x. PubMed PMID: 31340759; PubMed Central PMCID:  
534 PMCPMC6652013.
- 535 21. Horikawa DD, Kunieda T, Abe W, Watanabe M, Nakahara Y, Yukuhiro F, et al.  
536 Establishment of a rearing system of the extremotolerant tardigrade *Ramazzottius varieornatus*: a  
537 new model animal for astrobiology. Astrobiology. 2008;8(3):549-56. doi: 10.1089/ast.2007.0139.  
538 PubMed PMID: 18554084.
- 539 22. Jonsson KI, Hygum TL, Andersen KN, Clausen LK, Mobjerg N. Tolerance to Gamma  
540 Radiation in the Marine Heterotardigrade, *Echiniscoides sigismundi*. PLoS One.  
541 2016;11(12):e0168884. Epub 2016/12/21. doi: 10.1371/journal.pone.0168884. PubMed PMID:  
542 27997621; PubMed Central PMCID: PMCPMC5173286.

- 543 23. Jonsson KI. Radiation Tolerance in Tardigrades: Current Knowledge and Potential  
544 Applications in Medicine. *Cancers* (Basel). 2019;11(9):1333. Epub 2019/09/12. doi:  
545 10.3390/cancers11091333. PubMed PMID: 31505739; PubMed Central PMCID:  
546 PMCPMC6770827.
- 547 24. Cadet J, Wagner JR. DNA base damage by reactive oxygen species, oxidizing agents, and  
548 UV radiation. *Cold Spring Harb Perspect Biol*. 2013;5(2). Epub 2013/02/05. doi:  
549 10.1101/cshperspect.a012559. PubMed PMID: 23378590; PubMed Central PMCID:  
550 PMCPMC3552502.
- 551 25. Rieger KE, Chu G. Portrait of transcriptional responses to ultraviolet and ionizing radiation  
552 in human cells. *Nucleic Acids Res*. 2004;32(16):4786-803. doi: 10.1093/nar/gkh783. PubMed  
553 PMID: 15356296; PubMed Central PMCID: PMCPMC519099.
- 554 26. Altiero T, Guidetti R, Caselli V, Cesari M, Rebecchi L. Ultraviolet radiation tolerance in  
555 hydrated and desiccated eutardigrades. *J Zool Syst Evol Res*. 2011;49:104-10. doi: 10.1111/j.1439-  
556 0469.2010.00607.x. PubMed PMID: WOS:000289799800018.
- 557 27. Tsuboyama K, Osaki T, Matsuura-Suzuki E, Kozuka-Hata H, Okada Y, Oyama M, et al. A  
558 widespread family of heat-resistant obscure (Hero) proteins protect against protein instability and  
559 aggregation. *PLoS Biol*. 2020;18(3):e3000632. Epub 2020/03/13. doi:  
560 10.1371/journal.pbio.3000632. PubMed PMID: 32163402; PubMed Central PMCID:  
561 PMCPMC7067378 following competing interests: YT, KT, SI, EM-S, HK-H, and MO have a patent  
562 application related to this work. The other authors declare no competing interests.
- 563 28. van der Lee R, Buljan M, Lang B, Weatheritt RJ, Daughdrill GW, Dunker AK, et al.  
564 Classification of intrinsically disordered regions and proteins. *Chem Rev*. 2014;114(13):6589-631.  
565 Epub 2014/04/30. doi: 10.1021/cr400525m. PubMed PMID: 24773235; PubMed Central PMCID:  
566 PMCPMC4095912.
- 567 29. Hirata Y. Manganese-induced apoptosis in PC12 cells. *Neurotoxicol Teratol*.  
568 2002;24(5):639-53. Epub 2002/08/30. doi: 10.1016/s0892-0362(02)00215-5. PubMed PMID:

569 12200195.

570 30. Carmona A, Deves G, Roudeau S, Cloetens P, Bohic S, Ortega R. Manganese accumulates  
571 within golgi apparatus in dopaminergic cells as revealed by synchrotron X-ray fluorescence  
572 nanoimaging. ACS Chem Neurosci. 2010;1(3):194-203. Epub 2010/03/17. doi: 10.1021/cn900021z.  
573 PubMed PMID: 22778823; PubMed Central PMCID: PMCPMC3368660.

574 31. Alejandro S, Cailliatte R, Alcon C, Dirick L, Domergue F, Correia D, et al. Intracellular  
575 Distribution of Manganese by the Trans-Golgi Network Transporter NRAMP2 Is Critical for  
576 Photosynthesis and Cellular Redox Homeostasis. Plant Cell. 2017;29(12):3068-84. Epub  
577 2017/11/29. doi: 10.1105/tpc.17.00578. PubMed PMID: 29180598; PubMed Central PMCID:  
578 PMCPMC5757278.

579 32. Reddi AR, Jensen LT, Culotta VC. Manganese homeostasis in *Saccharomyces cerevisiae*.  
580 Chem Rev. 2009;109(10):4722-32. Epub 2009/08/27. doi: 10.1021/cr900031u. PubMed PMID:  
581 19705825; PubMed Central PMCID: PMCPMC3010240.

582 33. Jiang Z, Hu Z, Zeng L, Lu W, Zhang H, Li T, et al. The role of the Golgi apparatus in  
583 oxidative stress: is this organelle less significant than mitochondria? Free Radic Biol Med.  
584 2011;50(8):907-17. doi: 10.1016/j.freeradbiomed.2011.01.011. PubMed PMID: 21241794.

585 34. Yoshida H. ER stress response, peroxisome proliferation, mitochondrial unfolded protein  
586 response and Golgi stress response. IUBMB Life. 2009;61(9):871-9. doi: 10.1002/iub.229. PubMed  
587 PMID: 19504573.

588 35. Alborzinia H, Ignashkova TI, Dejure FR, Gendarme M, Theobald J, Wolfl S, et al. Golgi  
589 stress mediates redox imbalance and ferroptosis in human cells. Commun Biol. 2018;1:210. Epub  
590 2018/12/05. doi: 10.1038/s42003-018-0212-6. PubMed PMID: 30511023; PubMed Central  
591 PMCID: PMCPMC6262011.

592 36. Andrews S. FastQC a quality-control tool for high-throughput sequence data. 2015 [cited  
593 2015 May 21]. Available from: <http://www.bioinformatics.babraham.ac.uk/projects/fastqc/>.

594 37. Bray NL, Pimentel H, Melsted P, Pachter L. Near-optimal probabilistic RNA-seq

- 595 quantification. *Nat Biotechnol.* 2016;34(5):525-7. Epub 2016/04/05. doi: 10.1038/nbt.3519.  
596 PubMed PMID: 27043002.
- 597 38. Love MI, Huber W, Anders S. Moderated estimation of fold change and dispersion for  
598 RNA-seq data with DESeq2. *Genome Biol.* 2014;15(12):550. Epub 2014/12/18. doi:  
599 10.1186/s13059-014-0550-8. PubMed PMID: 25516281; PubMed Central PMCID:  
600 PMCPMC4302049.
- 601 39. Li H, Durbin R. Fast and accurate short read alignment with Burrows-Wheeler transform.  
602 *Bioinformatics.* 2009;25(14):1754-60. Epub 2009/05/20. doi: 10.1093/bioinformatics/btp324.  
603 PubMed PMID: 19451168; PubMed Central PMCID: PMCPMC2705234.
- 604 40. Chang Z, Li G, Liu J, Zhang Y, Ashby C, Liu D, et al. Bridger: a new framework for de  
605 novo transcriptome assembly using RNA-seq data. *Genome Biol.* 2015;16:30. doi: 10.1186/s13059-  
606 015-0596-2. PubMed PMID: 25723335; PubMed Central PMCID: PMCPMC4342890.
- 607 41. Simao FA, Waterhouse RM, Ioannidis P, Kriventseva EV, Zdobnov EM. BUSCO: assessing  
608 genome assembly and annotation completeness with single-copy orthologs. *Bioinformatics.*  
609 2015;31(19):3210-2. Epub 2015/06/11. doi: 10.1093/bioinformatics/btv351. PubMed PMID:  
610 26059717.
- 611 42. Keller O, Kollmar M, Stanke M, Waack S. A novel hybrid gene prediction method  
612 employing protein multiple sequence alignments. *Bioinformatics.* 2011;27(6):757-63. doi:  
613 10.1093/bioinformatics/btr010. PubMed PMID: 21216780.
- 614 43. Altschul SF, Madden TL, Schaffer AA, Zhang J, Zhang Z, Miller W, et al. Gapped BLAST  
615 and PSI-BLAST: a new generation of protein database search programs. *Nucleic Acids Res.*  
616 1997;25(17):3389-402. Epub 1997/09/01. doi: 10.1093/nar/25.17.3389. PubMed PMID: 9254694;  
617 PubMed Central PMCID: PMCPMC146917.
- 618 44. Buchfink B, Xie C, Huson DH. Fast and sensitive protein alignment using DIAMOND.  
619 *Nature Methods.* 2015;12(1):59-60. doi: DOI 10.1038/nmeth.3176. PubMed PMID:  
620 WOS:000347668600019.



- 621 45. O'Leary NA, Wright MW, Brister JR, Ciuffo S, Haddad D, McVeigh R, et al. Reference  
622 sequence (RefSeq) database at NCBI: current status, taxonomic expansion, and functional  
623 annotation. *Nucleic Acids Res.* 2016;44(D1):D733-45. doi: 10.1093/nar/gkv1189. PubMed PMID:  
624 26553804; PubMed Central PMCID: PMC4702849.
- 625 46. Emms DM, Kelly S. OrthoFinder: solving fundamental biases in whole genome  
626 comparisons dramatically improves orthogroup inference accuracy. *Genome Biol.* 2015;16:157.  
627 Epub 2015/08/06. doi: 10.1186/s13059-015-0721-2. PubMed PMID: 26243257; PubMed Central  
628 PMCID: PMC4531804.
- 629 47. Katoh K, Standley DM. MAFFT multiple sequence alignment software version 7:  
630 improvements in performance and usability. *Mol Biol Evol.* 2013;30(4):772-80. doi:  
631 10.1093/molbev/mst010. PubMed PMID: 23329690; PubMed Central PMCID: PMC3603318.
- 632 48. Price MN, Dehal PS, Arkin AP. FastTree 2--approximately maximum-likelihood trees for  
633 large alignments. *PLoS One.* 2010;5(3):e9490. doi: 10.1371/journal.pone.0009490. PubMed PMID:  
634 20224823; PubMed Central PMCID: PMC2835736.
- 635 49. Letunic I, Bork P. Interactive Tree Of Life (iTOL) v4: recent updates and new  
636 developments. *Nucleic Acids Res.* 2019;47(W1):W256-W9. Epub 2019/04/02. doi:  
637 10.1093/nar/gkz239. PubMed PMID: 30931475; PubMed Central PMCID: PMC6602468.
- 638 50. Bailey TL, Boden M, Buske FA, Frith M, Grant CE, Clementi L, et al. MEME SUITE: tools  
639 for motif discovery and searching. *Nucleic Acids Res.* 2009;37(Web Server issue):W202-8. doi:  
640 10.1093/nar/gkp335. PubMed PMID: 19458158; PubMed Central PMCID: PMC2703892.
- 641 51. Arakawa K, Mori K, Ikeda K, Matsuzaki T, Kobayashi Y, Tomita M. G-language Genome  
642 Analysis Environment: a workbench for nucleotide sequence data mining. *Bioinformatics.*  
643 2003;19(2):305-6. Epub 2003/01/23. doi: 10.1093/bioinformatics/19.2.305. PubMed PMID:  
644 12538262.
- 645 52. Arakawa K, Tomita M. G-language system as a platform for large-scale analysis of high-  
646 throughput omics data. *Journal of Pesticide Science.* 2006;31(3):282-8. doi: DOI

- 647 10.1584/jpestics.31.282. PubMed PMID: WOS:000240114400006.
- 648 53. Kabsch W. Xds. *Acta Crystallogr D Biol Crystallogr*. 2010;66(Pt 2):125-32. Epub  
649 2010/02/04. doi: 10.1107/S0907444909047337. PubMed PMID: 20124692; PubMed Central  
650 PMCID: PMCPMC2815665.
- 651 54. Evans PR. An introduction to data reduction: space-group determination, scaling and  
652 intensity statistics. *Acta Crystallogr D Biol Crystallogr*. 2011;67(Pt 4):282-92. Epub 2011/04/05.  
653 doi: 10.1107/S090744491003982X. PubMed PMID: 21460446; PubMed Central PMCID:  
654 PMCPMC3069743.
- 655 55. Adams PD, Afonine PV, Bunkoczi G, Chen VB, Davis IW, Echols N, et al. PHENIX: a  
656 comprehensive Python-based system for macromolecular structure solution. *Acta Crystallogr D  
657 Biol Crystallogr*. 2010;66(Pt 2):213-21. Epub 2010/02/04. doi: 10.1107/S0907444909052925.  
658 PubMed PMID: 20124702; PubMed Central PMCID: PMCPMC2815670.
- 659 56. Langer G, Cohen SX, Lamzin VS, Perrakis A. Automated macromolecular model building  
660 for X-ray crystallography using ARP/wARP version 7. *Nat Protoc*. 2008;3(7):1171-9. Epub  
661 2008/07/05. doi: 10.1038/nprot.2008.91. PubMed PMID: 18600222; PubMed Central PMCID:  
662 PMCPMC2582149.
- 663 57. Emsley P, Lohkamp B, Scott WG, Cowtan K. Features and development of Coot. *Acta  
664 Crystallogr D Biol Crystallogr*. 2010;66(Pt 4):486-501. Epub 2010/04/13. doi:  
665 10.1107/S0907444910007493. PubMed PMID: 20383002; PubMed Central PMCID:  
666 PMCPMC2852313.
- 667 58. Murshudov GN, Vagin AA, Dodson EJ. Refinement of macromolecular structures by the  
668 maximum-likelihood method. *Acta Crystallogr D Biol Crystallogr*. 1997;53(Pt 3):240-55. Epub  
669 1997/05/01. doi: 10.1107/S0907444996012255. PubMed PMID: 15299926.
- 670 59. Chen VB, Arendall WB, 3rd, Headd JJ, Keedy DA, Immormino RM, Kapral GJ, et al.  
671 MolProbity: all-atom structure validation for macromolecular crystallography. *Acta Crystallogr D  
672 Biol Crystallogr*. 2010;66(Pt 1):12-21. Epub 2010/01/09. doi: 10.1107/S0907444909042073.

673 PubMed PMID: 20057044; PubMed Central PMCID: PMCPMC2803126.

674 60. Holm L. DALI and the persistence of protein shape. *Protein Sci.* 2020;29(1):128-40. Epub  
675 2019/10/14. doi: 10.1002/pro.3749. PubMed PMID: 31606894; PubMed Central PMCID:  
676 PMCPMC6933842.

677 61. Richaud M, Le Goff E, Cazevielle C, Ono F, Mori Y, Saini NL, et al. Ultrastructural analysis  
678 of the dehydrated tardigrade *Hypsibius exemplaris* unveils an anhydrobiotic-specific architecture.  
679 *Sci Rep.* 2020;10(1):4324. Epub 2020/03/11. doi: 10.1038/s41598-020-61165-1. PubMed PMID:  
680 32152342.

681

682

683

684 **Fig 1. Identification of a novel stress responsive gene family conserved within Tardigrada**  
685 **phylum.** [a] *R. varieornatus* specimens were exposed to 2.5kJ/m<sup>2</sup> of UVC and movements were  
686 observed at each time point. Asterisks indicate significant differences (Tukey HSD test, p-value <  
687 0.05). [b] Expression values of two tardigrade-specific genes with no known annotations. [c]  
688 Probability plot of disordered regions in g12777 predicted by DISOPRED or IUPRED. Disordered  
689 regions predicted are indicated with a gray highlight. [d] Phylogenetic tree of g12777 orthologs in  
690 Tardigrada. Each ortholog was colored by the corresponding lineage. Four subfamilies were found and  
691 named according to the major lineage.

692 **Fig 2. g12777 protein has a SOD-like -sandwich fold and binds to Mn<sup>2+</sup> ion.** [a] The crystal  
693 structure of the catalytic domain of the g12777 protein. Bound Mn<sup>2+</sup> ion and residues involved in  
694 disulfide bond formation are indicated with a pink sphere and stick, respectively. Positions of the N  
695 and C termini are indicated as letters. [b] Electrostatic surface potential of g12777 protein. The surface  
696 model of g12777 is colored according to the electrostatic surface potential (blue, positive; red,  
697 negative; scale from -50 to +50 kT/e). [c] Close-up view of the Mn<sup>2+</sup>-binding site. The binding site  
698 is comprised from three aspartic acid residues (D92, D98, and D131) and a disulfide bond with close

699 proximity (C91 and C97). [d]  $Mn^{2+}$  binding affinity measured by isothermal titration calorimetry.  
700 The left panel indicates the raw data, while the right panel represents the integrated heat values  
701 corrected for the heat of dilution and fit to a one-site binding model (solid line).

702 **Fig 3. AMNP is a Golgi apparatus localizing protein that enhances anti-oxidative stress.** [a] The  
703 g12777 protein was fused to GFP and transfected to HEK293 cells. Cells were co-transfected with  
704 CellLight Golgi-RFP and DAPI. Yellow arrows indicate the co-localization of g12777 and Golgi-  
705 RFP. Scale bar 25 $\mu$ m. [b] Cell transfected with g12777-GFP were exposed to hydrogen peroxide for  
706 30 minutes and subjected to MTT assay after 24 hours incubation. Only the full-length g12777-GFP  
707 show an increase in survival at around 0.2-0.3 mM. ANOVA + Tukey HSD (FDR < 0.05). [c] Cells  
708 transfected with g12777-GFP were exposed to hydrogen peroxide for 30 minutes and subjected to  
709 MACS flow cytometry to detect SYTOX blue and AnnexinV-Alexa 657 fluorescence after 24 hours  
710 incubation. Only full-length g12777-GFP shows an increase in survival. ANOVA + Tukey HSD  
711 (FDR <0.05). [d] Peroxidase activity of the recombinant protein lacking the N terminal 62aa region.  
712 Peroxidase function was present only when manganese ions were present. Error bars indicate standard  
713 errors.

714 **S1 Table: Statistics of RNA-Seq data obtained in this study.** Statistics of each RNA-Seq data  
715 sequenced in this study. Mapping ratio for BWA mapping are shown.

716 **S2 Fig. Expression profiles of UVC exposed *R. varieornatus*.** Gene expression profiles of *R.*  
717 *varieornatus* specimens exposed to 2.5kJ/m<sup>2</sup> UVC shown as a heatmap. TPM values were Z-scaled  
718 to between samples. Expression and sample profiles were clustered with by Ward method based on  
719 Spearman correlation.

720 **S3 Table. Highly expressed or regulated genes in Short time-course.** Genes with TPM values >  
721 1000 and fold change > 4 are highlighted in purple and orange, respectively.

722 **S4 Table. Highly expressed or regulated genes in Long time-course.** Genes with TPM values >  
723 1000 and fold change > 4 are highlighted in purple and orange, respectively.

724 **S5 Text. Abnormal mitochondrial structure in recovering specimens.** We found mitochondria-  
725 related genes, in particular, the mitochondrial chaperone BCS1 and the mitophagy related gene  
726 Sequestosome, to have a high fold change. We have found similar inductions during *H. exemplaris*  
727 anhydrobiosis, suggesting the existence of mitochondria stresses during desiccation or UVC  
728 exposure-response. Oxidative stress caused during desiccation (or UVC exposure) would also induce  
729 extensive stress to the mitochondria. We conducted TEM observations of *R. varieornatus* specimens  
730 recovering from desiccation. We observed abnormal mitochondrial morphology in specimens 3 hours  
731 after rehydration, not in 30 minutes (**S6 Fig**). This suggests that mitochondrial stress may be occurring  
732 during the initial 3 hours, resulting in morphological changes at 3 hours after rehydration. Induction  
733 of Sequestosome may be related to mitophagy of damaged mitochondria. A previous study using *H.*  
734 *exemplaris* specimens also has observed mitochondrial morphology, however, they have seen an  
735 increase in mitochondrial size, not a decrease as we have observed [61]. These inconsistencies may  
736 reflect the differences in mitochondrial damage that occurred during anhydrobiosis in the two species.

737 **S6 Fig. Abnormal mitochondrial structures in anhydrobiosis recovering *R. varieornatus*.**  
738 Transmission electron microscopy images of *R. varieornatus* specimens during recovery from  
739 anhydrobiosis. [ad]: 0.5h [be]: 3h, [cf]: 18h post recovery. [abc]: 42,00x magnification of  
740 mitochondria. Scale bar 5 $\mu$ m. [def]: 21,000 magnification of mitochondria. Abnormal mitochondria  
741 structures can be observed (Red arrows). Scale bar 1 $\mu$ m. [gh] Decrease in area [g] and circularity [h]  
742 values in individuals recovering from anhydrobiosis. Mitochondria structures were outlined in  
743 ImageJ (0.5h: 159, 3h: 355, 18h: 154 structures) and was statistically tested (ANOVA + Tukey HSD,  
744 FDR<0.05).

745 **S7 Table. List of differentially expressed genes.** List of genes differentially expressed in both UVC  
746 response and slow-dry desiccation. Known anhydrobiosis related genes are highlighted in orange.

747 **S8 Table. Enrichment analysis of DEGs.** Enrichment analysis of KEGG pathway, Pfam-A and  
748 Gene ontology term of differentially expressed genes. Terms colored in red are terms suggested to be  
749 related to anhydrobiosis in previous studies

750 **S9 Text. Details on identification of novel stress-responsive gene families.** To validate the  
751 conservation within Tardigrada, we submitted gene sequences to a BLAST search against our in-  
752 house and publicly accessible genomes/transcriptomes. We first predicted approximately 10-90  
753 thousand genes in various tardigrade lineages and then identified orthologs by BLASTP search or  
754 OrthoFinder clustering (**S12 Table, S13 Table, S14 Table**). Most of the lineages showed conservation  
755 of g2856 (excluding Halechiniscidae family in Arthrotardigrada), indicating that this gene family is  
756 highly conserved in the phylum (**S12 Table, S13 Table**). On the contrary, we found that g241 was  
757 lost in the Apochela, Echiniscoididae and Arthrotardigrada lineages (**S12 Table, S14 Table**).  
758 Additionally, initial TBLASTX searches against the publicly accessible *Echiniscoides sigismundi*  
759 and *Richterius coronifer* transcriptome assemblies indicated the loss of g2856 orthologs both species.  
760 We determined several raw RNA-Seq reads that showed homology against g2856 coding sequences,  
761 which implied the existence of g2856 orthologs. Therefore, we re-assembled both the *E. sigismundi*  
762 and *R. coronifer* transcriptome using previously sequenced RNA-Seq data with Bridger. BLASTX  
763 searches against this re-assembly found approximately 15 g2856 orthologs but no g241 orthologs in  
764 *E. sigismundi*. On the other hand, we detected 23 g241 and 64 g2856 orthologs in *R. coronifer*. The  
765 lack of g241 or g2856 orthologs in previous transcriptome assemblies may have occurred during the  
766 filtering stage. Our in-house transcriptome sequencing data supported the existence of both gene  
767 families in *R. coronifer* (56 g2856 and 17 g241 orthologs) and 12 g2856 orthologs in *E. sigismundi*.  
768 Together, these results support that the g241 is lost in the Echiniscoididae, Arthropoda, and Apochela  
769 lineages. Three of the g2856 orthologs (including g2856) were found to be mispredicted in our gene  
770 set (**S15 Table**).

771 **S10 Table. Expression of g241.t1.** TPM values of g241 orthologs in *R. varieornatus* UVC response.

772 **S11 Table. Expression of AMNP.** TPM values of g12777 orthologs in *R. varieornatus* UVC  
773 response.

774 **S12 Table. AMNP and g241.t1 orthologs within Tardigrada identified by BLASTP.** Coding  
775 sequences of g241.t1 and g12777.t1 were submitted to BLASTP search against predicted proteome

776 sequences of indicated species in our in-house genome database and additional transcriptome  
777 assemblies.

778 **S13 Table. AMNP copy numbers within Tardigrada identified by Orthofinder.** Number of  
779 genes classified as g12777 orthologs by Orthofinder.

780 **S14 Table. g241 copy numbers within Tardigrada identified by Orthofinder.** Number of genes  
781 classified as g241 orthologs by Orthofinder.

782 **S15 Table. Refinement of AMNP gene regions.** Mispredicted AMNP orthologs in *R. varieornatus*  
783 genome.

784 **S16 Fig. Phylogenetic analysis g241 orthologs within Tardigrada.** Phylogenetic tree of tardigrade  
785 g241 orthologs and bacterial orthologs. Amino acid sequences were aligned with Mafft and the  
786 phylogenetic tree was constructed with FastTree with 1000 bootstraps (-boot, -gamma). CAHS genes  
787 were used as an out-group.

788 **S17 Text. Categorization of g241 orthologs.** The g241 orthologs in *H. exemplaris* were identified  
789 as a high-confidence horizontally transferred gene candidate in our previous study (**S18 Table**).  
790 BLASTP searches against TrEMBL and NCBI nr databases indicated that the majority of homologs  
791 originates from Gammaproteobacteria species (**S19 Table, S20 Table**). This suggests that this gene  
792 family may have been integrated into the tardigrade genome before the divergence of these  
793 Eutardigrada and Heterotardigrada. We also have found several orthologs in Ciliophora, Chlorophyta,  
794 and Acanthamoeba, however, the conservation patterns suggest that these genes may also be results  
795 of horizontal transfer into these organisms. Several of these bacterial orthologs were found to be fused  
796 to the C-terminal end of haem peroxidases. These regions do not have any functional domains and  
797 are not predicted to be a disordered region, suggesting that this gene itself may not have anti-oxidative  
798 stress

799 **S18 Table. HGT statistics of g241 orthologs from previous studies.** HGT statistics calculated in  
800 our previous study[13] for g241 orthologs.

801 **S19 Table. g241.t1 orthologs identified from NCBI nr database.** List of orthologs identified by  
802 Diamond BLASTP search (E-value < 1E-5) against NCBI nr database. Tardigrade, non-tardigrade  
803 eukaryotic, and bacterial hits were each colored in gray, yellow, and green. *H. exemplaris* orthologs  
804 colored in red had gene annotations, but validation by RNA-Seq data mapping indicated that these  
805 genes may be mis-predicted.

806 **S20 Table. g241.t1 orthologs identified from RefSeq database.** List of orthologs identified by  
807 Diamond BLASTP search (E-value < 1E-5) against NCBI Bacteria RefSeq complete genome  
808 sequences. Genes before and after g241 orthologs are shown.

809 **S21 Table. Syntenic information of g2856 and g241 orthologs in *R. varieornatus*.** Annotation of  
810 5 genes prior and after g2856 orthologs in *R. varieornatus*. g2856 and g241 orthologs are highlighted  
811 in red.

812 **S22 Fig. Metal-binding property and structural detail of g12777 globular domain.** [a,b] The  
813 crystal structures of catalytic domain of g12777 complexed with Mn<sup>2+</sup> [a] and Zn<sup>2+</sup> [b]. All  
814 crystallographically observed metal ion binding sites are indicated. [c] Topology diagram of g12777  
815 catalytic domain. [d] Close-up view of the Zn<sup>2+</sup>-binding site. The residues comprising binding site  
816 1 (D92, D98, D161, and D163) and the disulfide bond (C91 and C97) are indicated. [e] Conservation  
817 of residues. All g12777 orthologs were submitted to MEME search. [f] Conserved residues of g12777.  
818 The conserved residues are colored according to the bit scores obtained from MEME analysis. [g] Ca<sup>2+</sup>  
819 and Zn<sup>2+</sup> ion binding affinity measured by isothermal titration calorimetry. The upper two panels  
820 indicate the raw data, while the bottom two panel represent the integrated heat values corrected for  
821 the heat of dilution and fit to a one-site binding model (solid line); red: Ca<sup>2+</sup>, cyan: Zn<sup>2+</sup>.

822 **S23 Table: Data collection and refinement statistics for g12777.** Crystal parameters and  
823 refinement statistics for Mn<sup>2+</sup>- and Zn<sup>2+</sup>-bound g12777 protein catalytic domain are summarized.  
824 \*One crystal for each structure was used for diffraction data collection.

825 **S24 Text: Details on the crystal structure of g12777 protein.** In the Zn<sup>2+</sup>-bound crystal structure,  
826 five Zn<sup>2+</sup> ions (Zn-1-5) originated from the crystallization buffer containing 300 mM zinc acetate



827 were observed, while  $\text{Ca}^{2+}$  originated from the protein buffer (2 mM calcium chloride) was not. We  
828 prepared  $\text{Mn}^{2+}$ -bound g12777 crystals by soaking method using  $\text{Zn}^{2+}$ -bound crystals. Upon soaking  
829 of excess amount of  $\text{Mn}^{2+}$  (50 mM),  $\text{Zn}^{2+}$  was replaced with  $\text{Mn}^{2+}$  in Mn-1 and newly appeared in  
830 Mn-2 (**S21a Fig**). On the other hand,  $\text{Zn}^{2+}$  in Zn-2-5 disappeared in the  $\text{Mn}^{2+}$ -bound crystal structure.  
831 As predicted from the bioinformatics analysis, the crystal structure of putative catalytic domain  
832 (residues Gly63–Leu231) of the g12777 protein displayed a characteristic  $\beta$ -sandwich fold  
833 comprising seven  $\beta$ -strands and three  $3_{10}$  helices with three disulphide bridges (C91-C97, C146-  
834 C225, and C176-C200) (**Fig 2a, S21bc Fig**). In the crystal structure of  $\text{Mn}^{2+}$ -bound form, a part of  
835  $\beta 5$ – $\beta 6$  loop (residues 163–168) around the  $\text{Mn}^{2+}$ -binding site was disordered, suggesting its flexible  
836 nature. Comparison of the structure of the  $\beta$ -sandwich domain of g12777 with known protein  
837 structures revealed that the g12777 protein structure has very weak similarities with structures of  
838 calcium-binding C2 domain involved in lipid interaction ( $Z$ -score = 5.1–5.5; RMSD = 2.5–3.2 Å;  
839 identity = 5–13%; PDB codes: 2JGZ, 1WFJ, and 4IHB). In addition, it has subtle similarity with a  
840 Cu/Zn-SOD monomeric circular permutant ( $Z$ -score = 4.1; RMSD = 3.4 Å; identity = 5%; PDB code:  
841 5J0C).

842 **S25 Table. Metal ion affinity of recombinant proteins.** Affinity values for metal ions with g12777  
843 proteins.

844 **S26 Fig. Localization of other AMNP orthologs.** The localization of top six high expressed AMNP  
845 orthologs were validated using the same method. All of these orthologs showed localization to the  
846 Golgi apparatus.

847 **S27 Fig. Comparison of peroxidase function with Bovine liver catalase.** The peroxidase function  
848 of AMNP was compared to those of Bovine liver catalase.

849

850

851

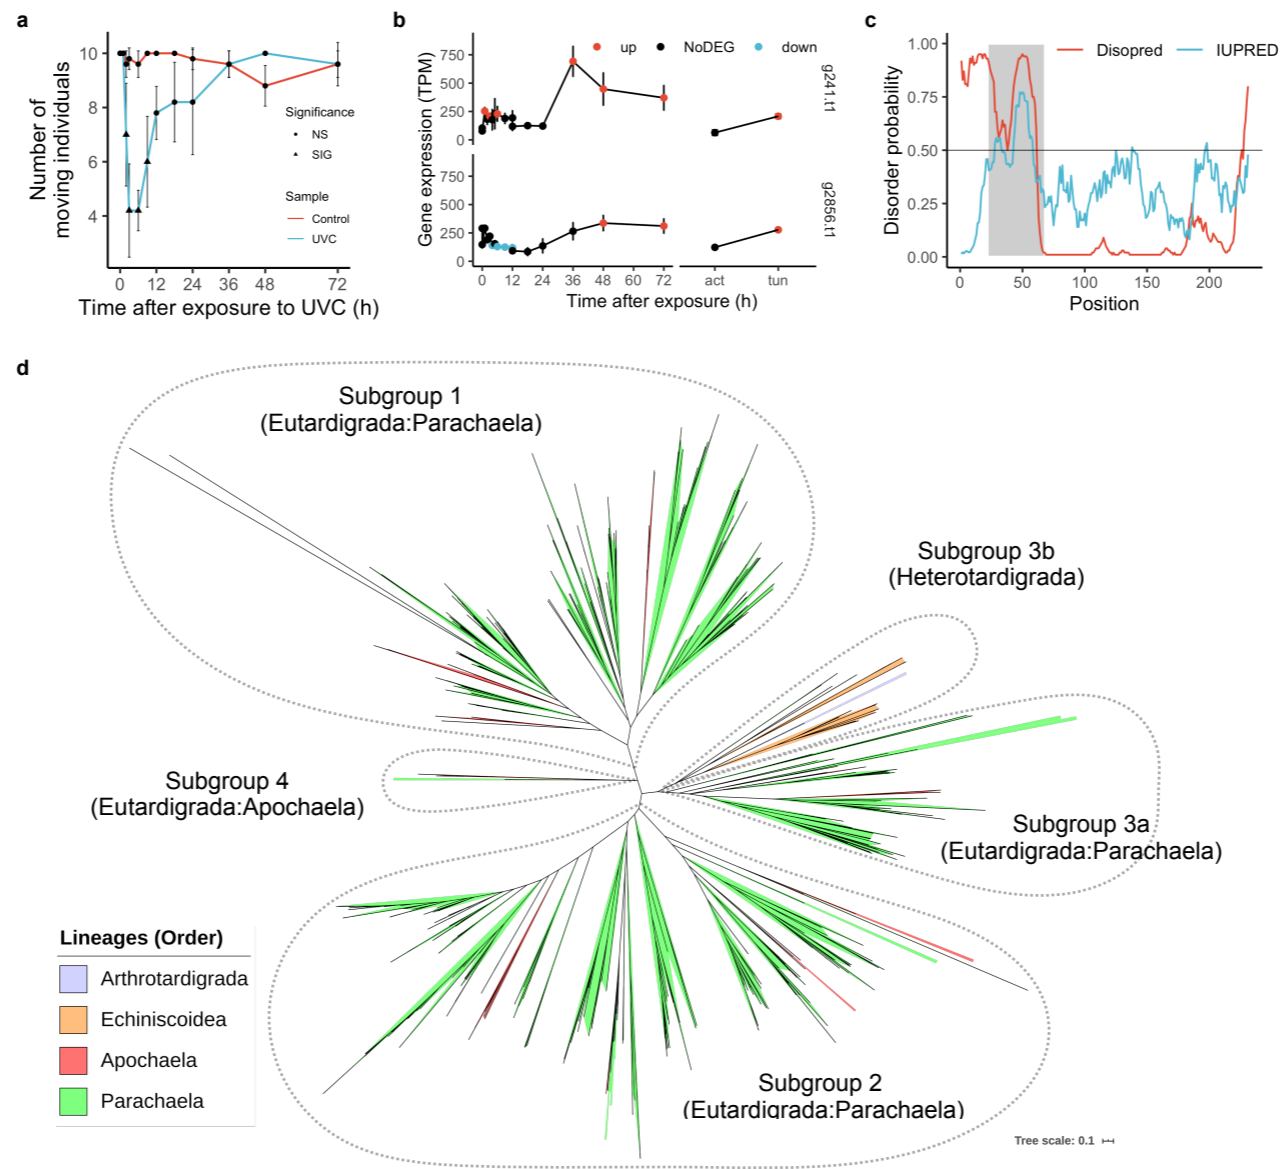

**Figure 1**

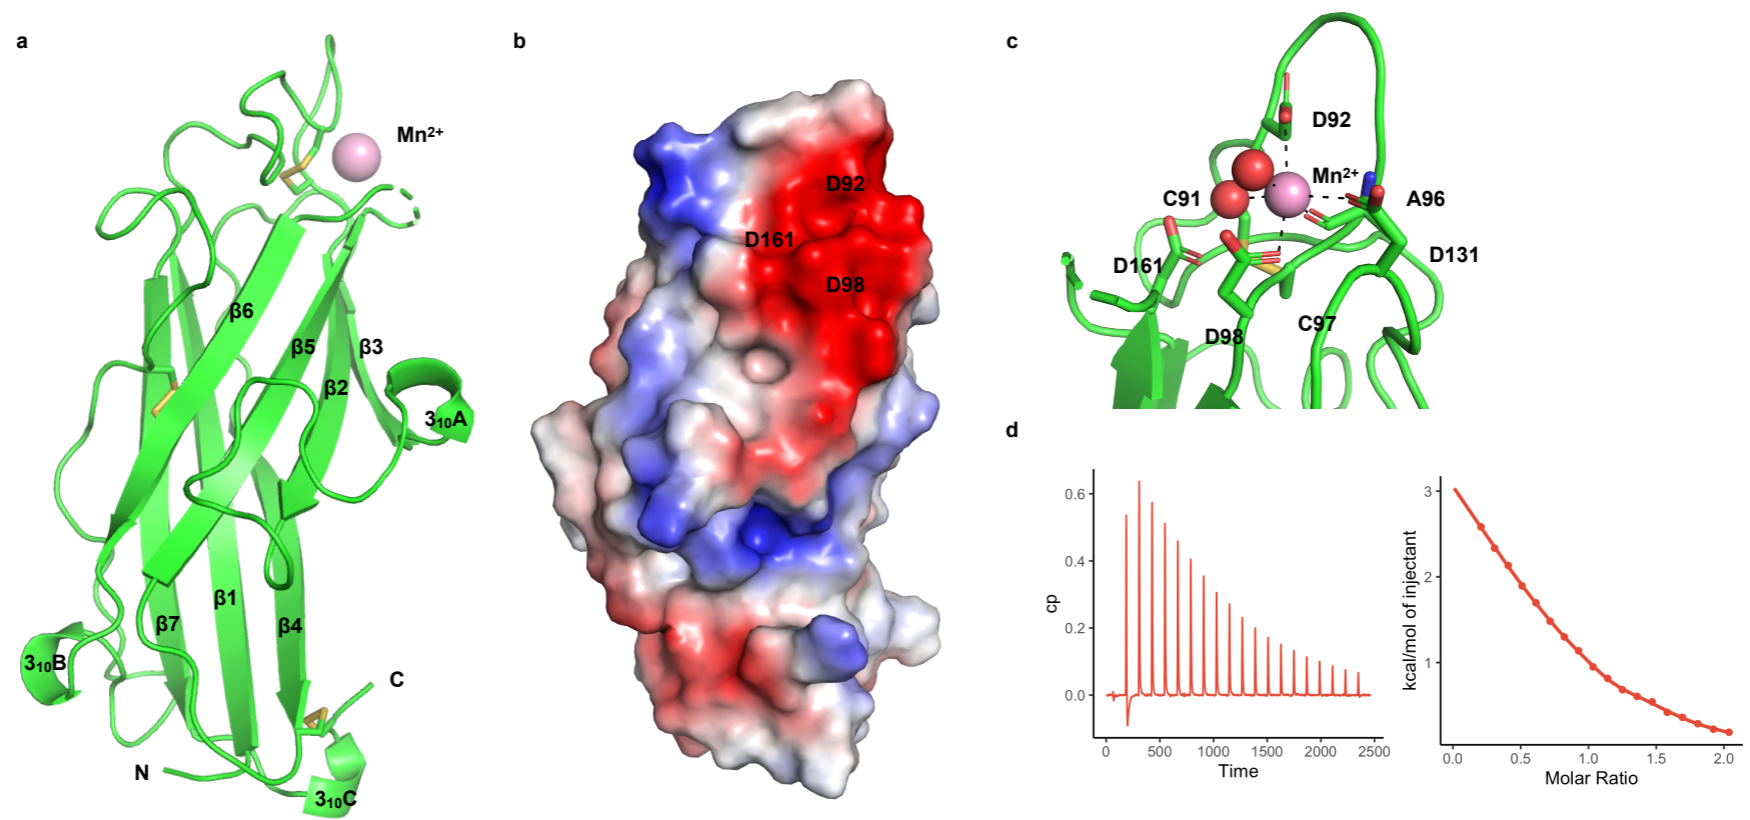

**Figure 2**

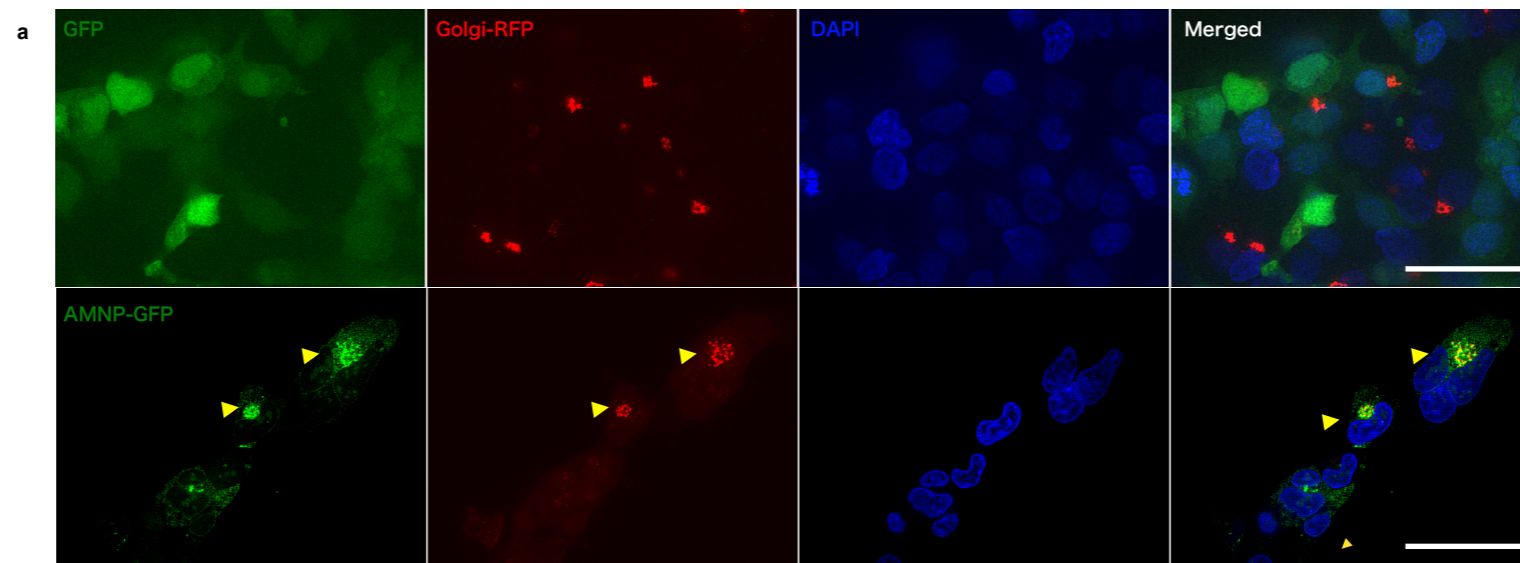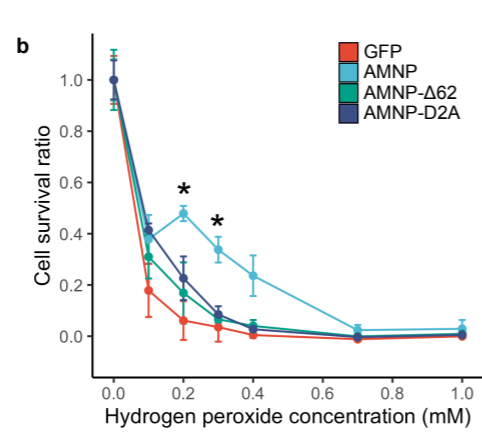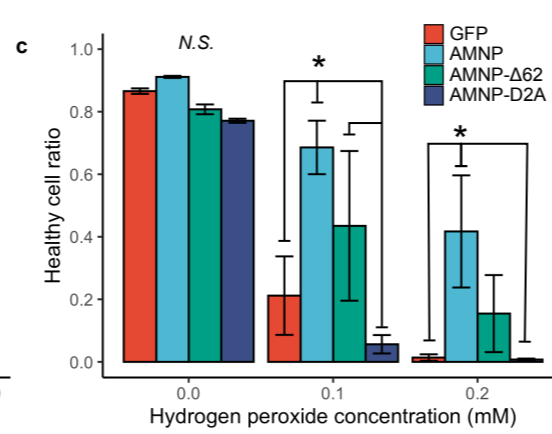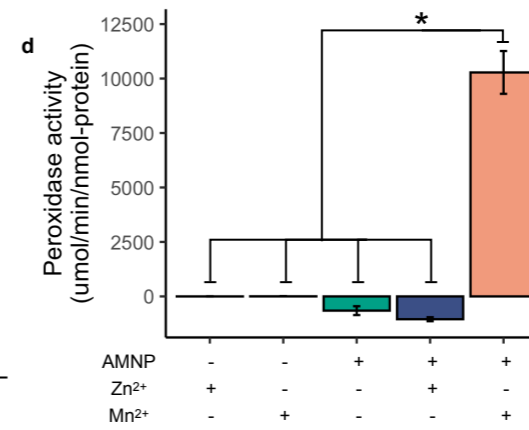

**Figure 3**

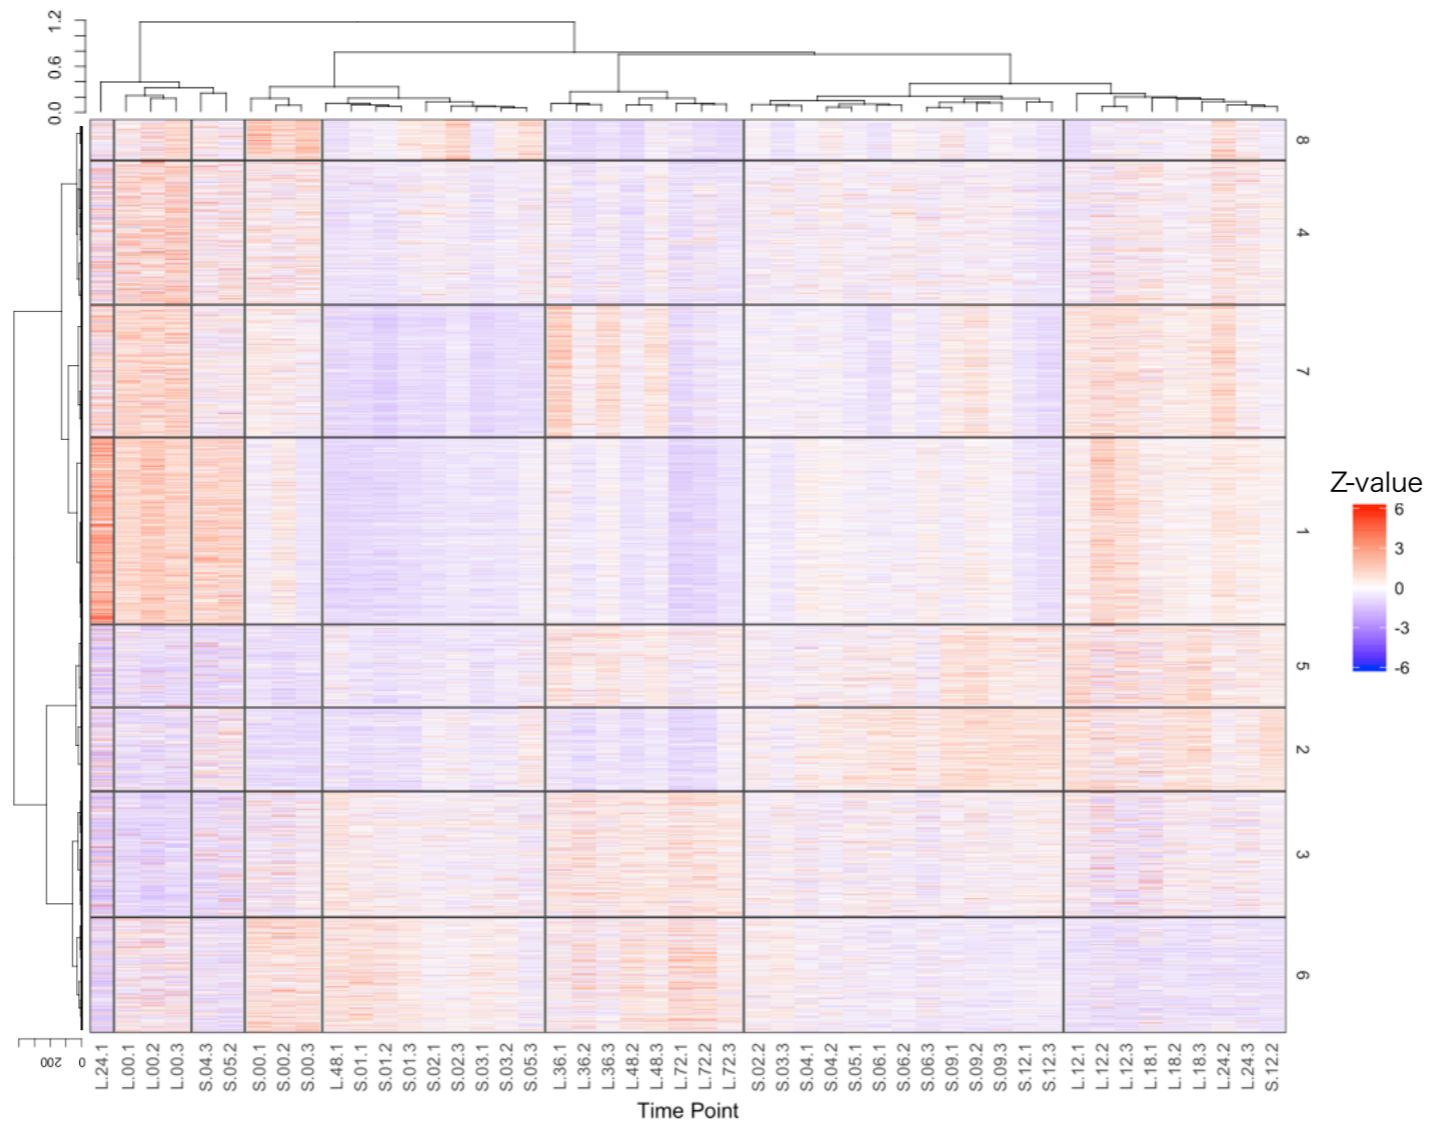

**S2 Fig**

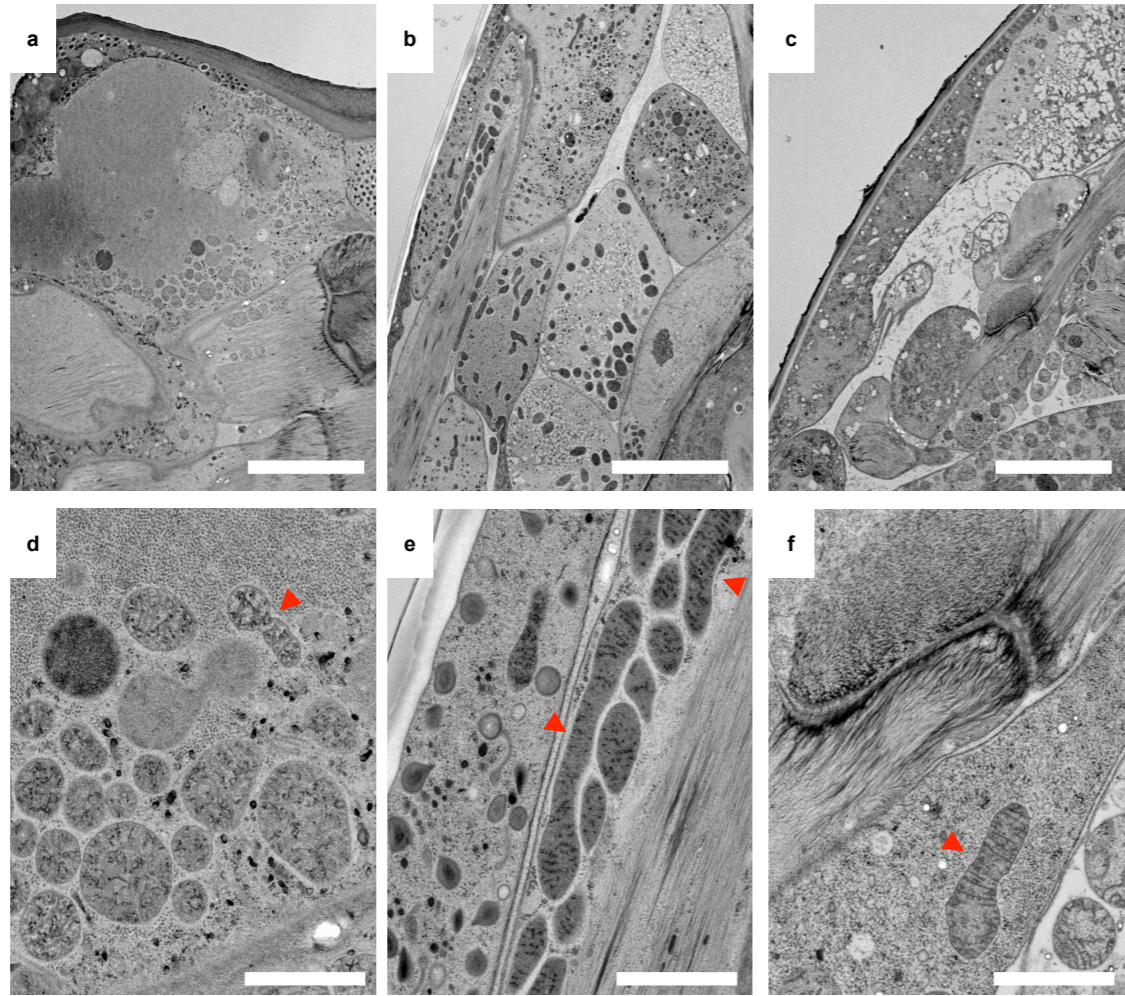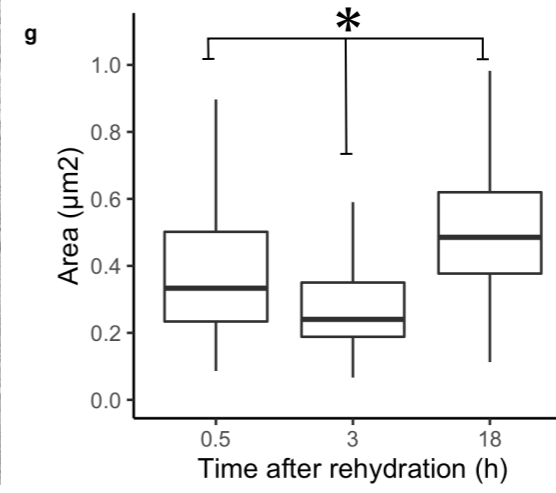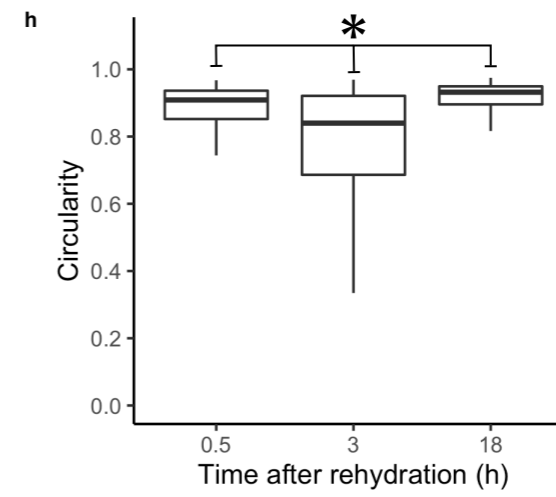

**S6 Fig**

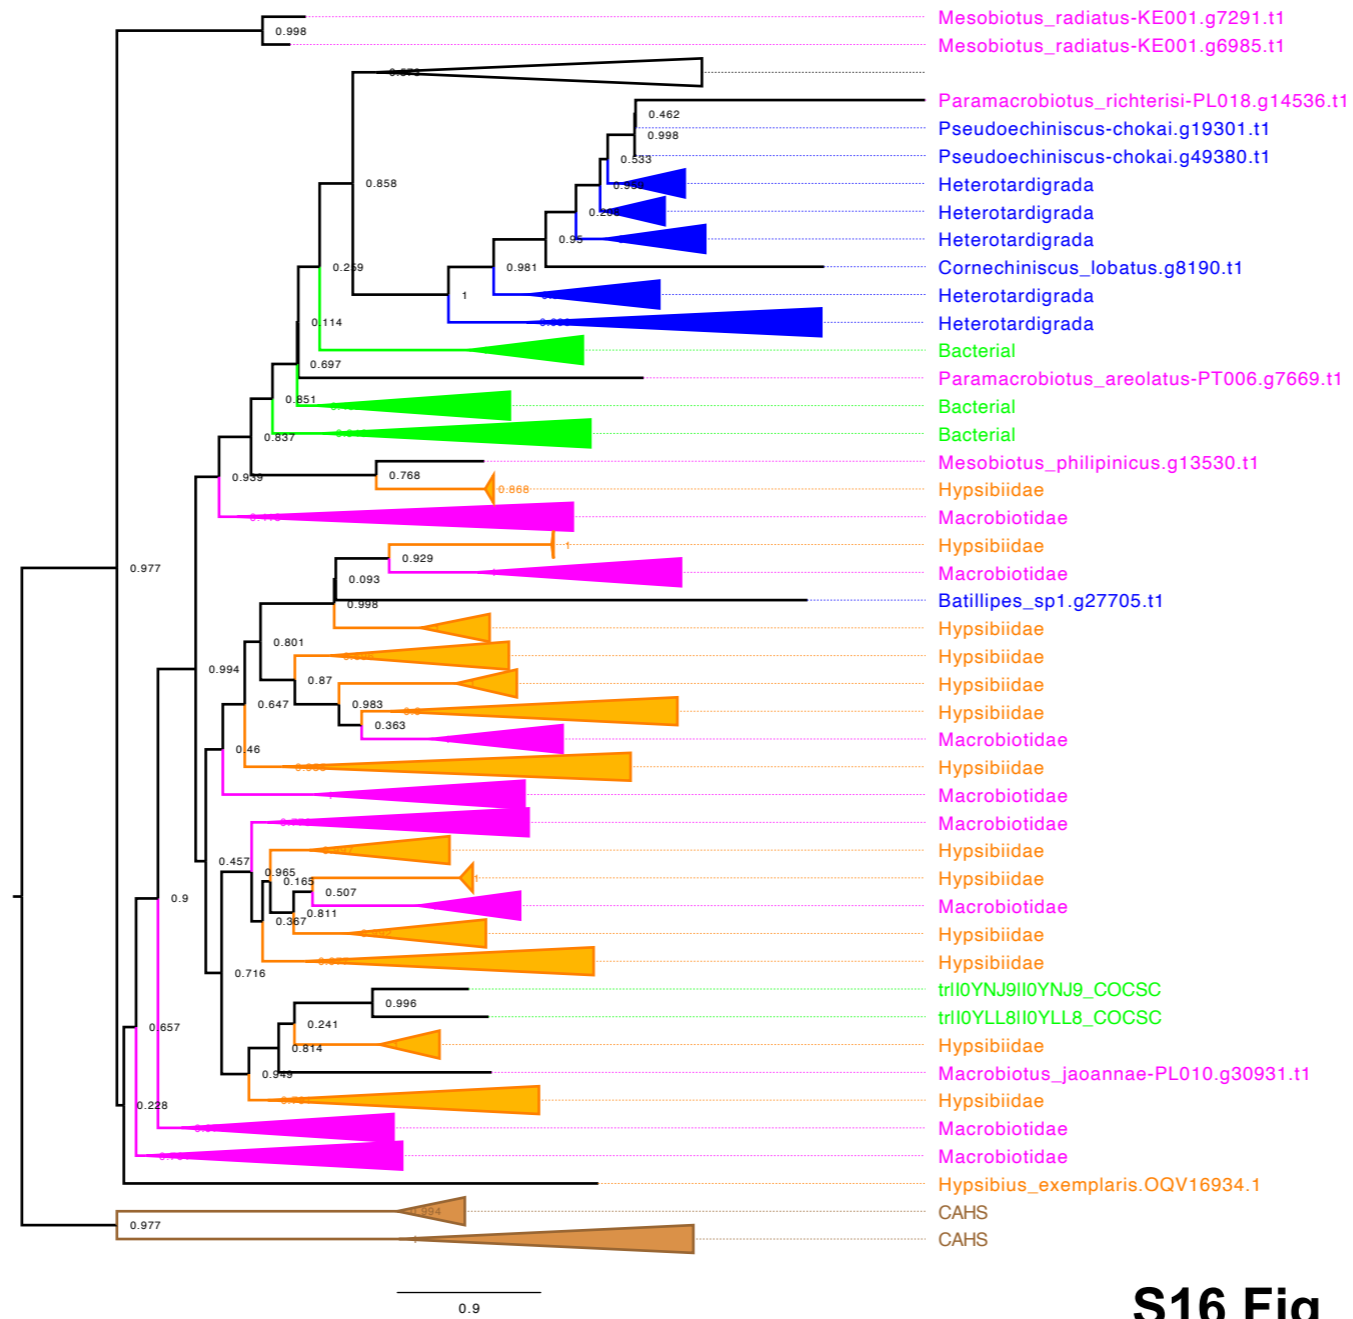

**S16 Fig**

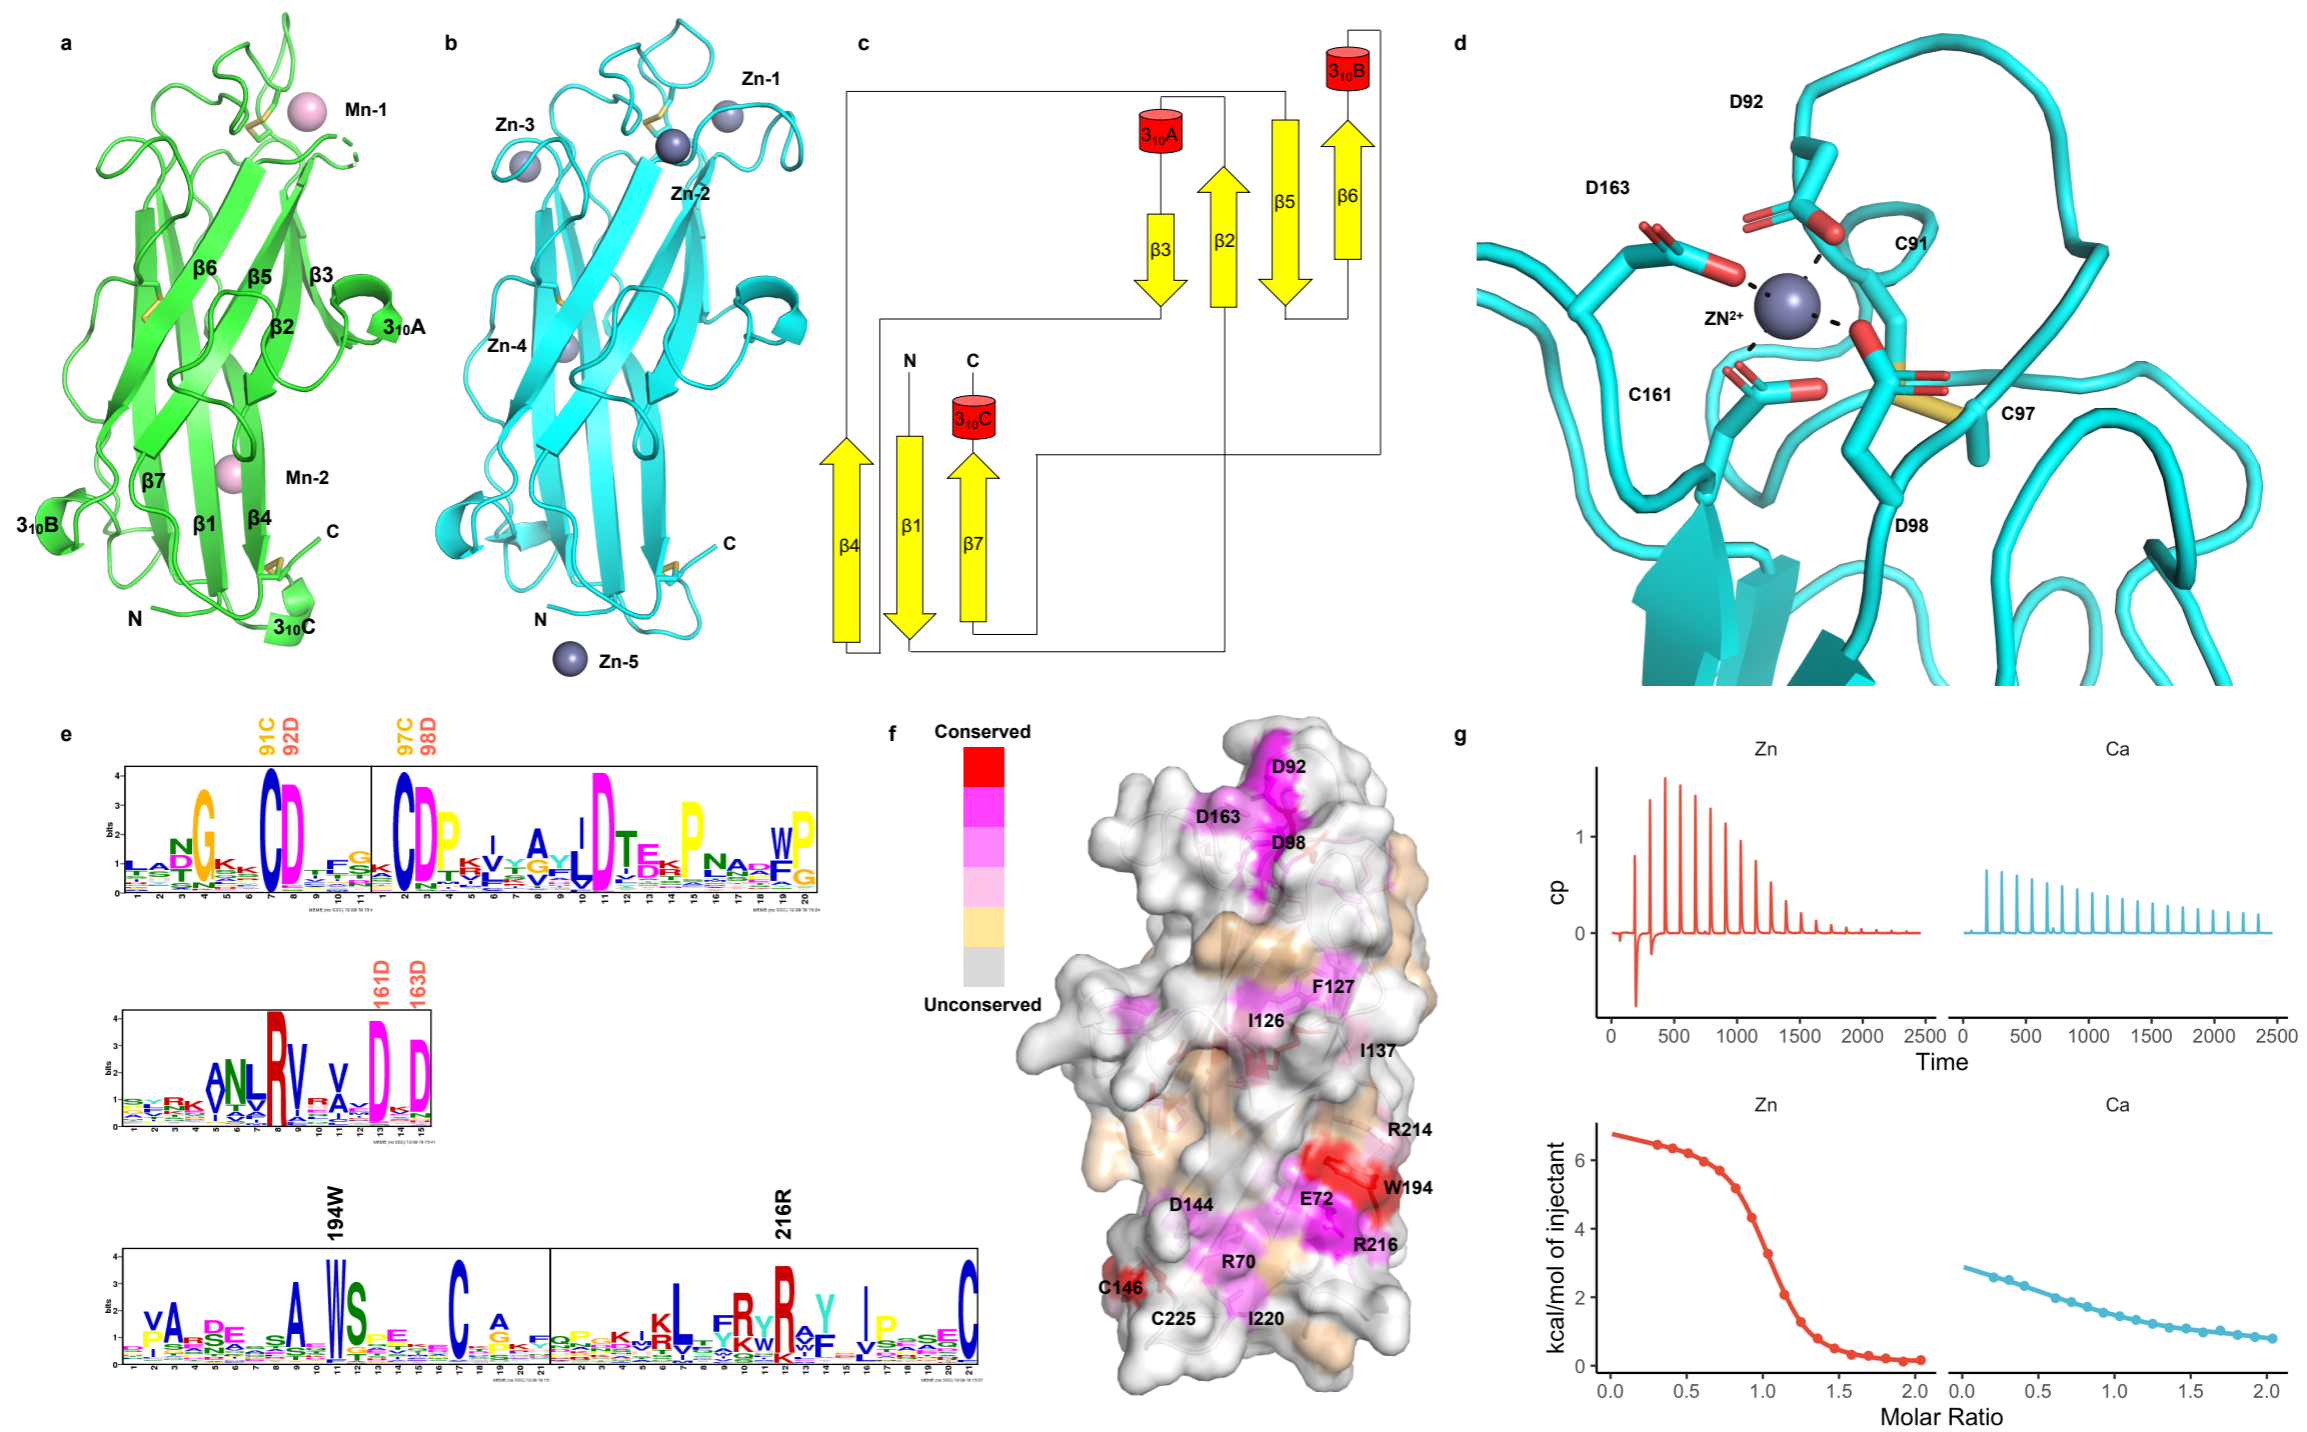

**S22 Fig**



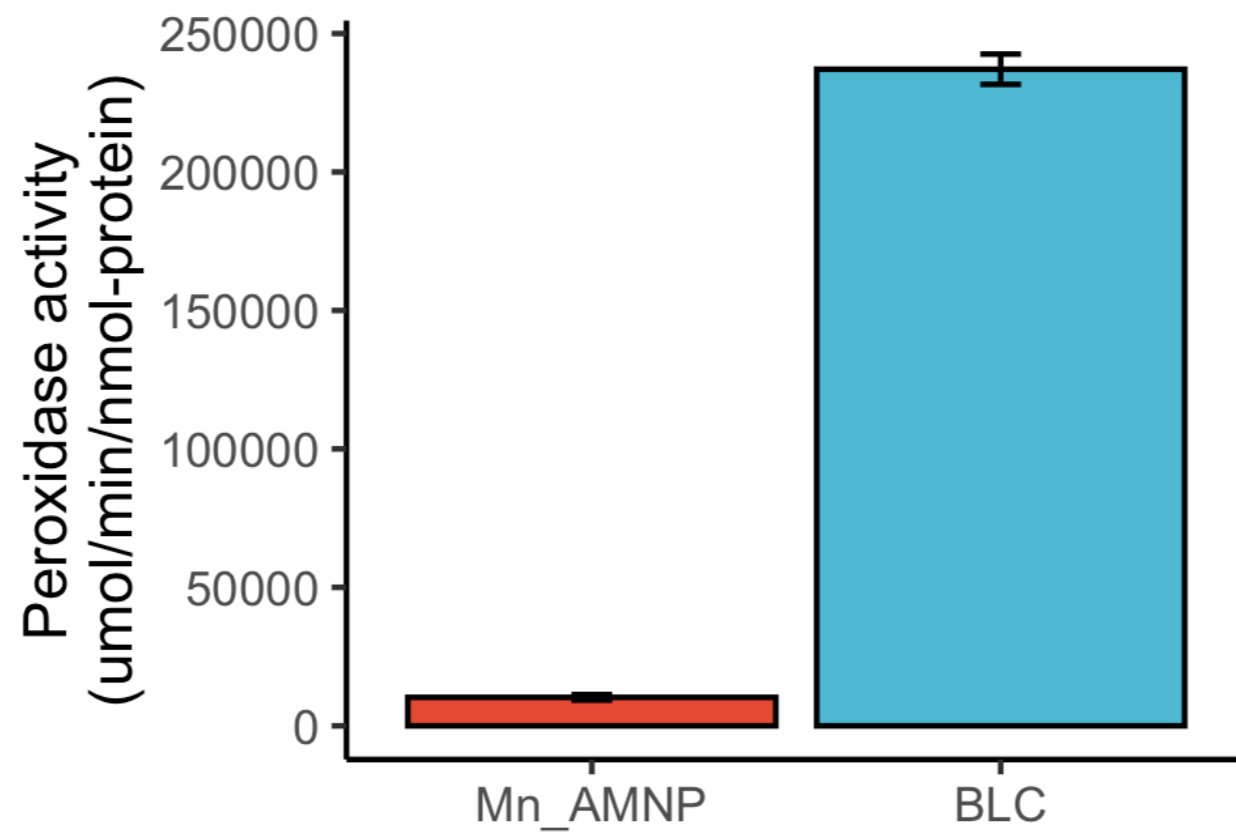

**S26 Fig**

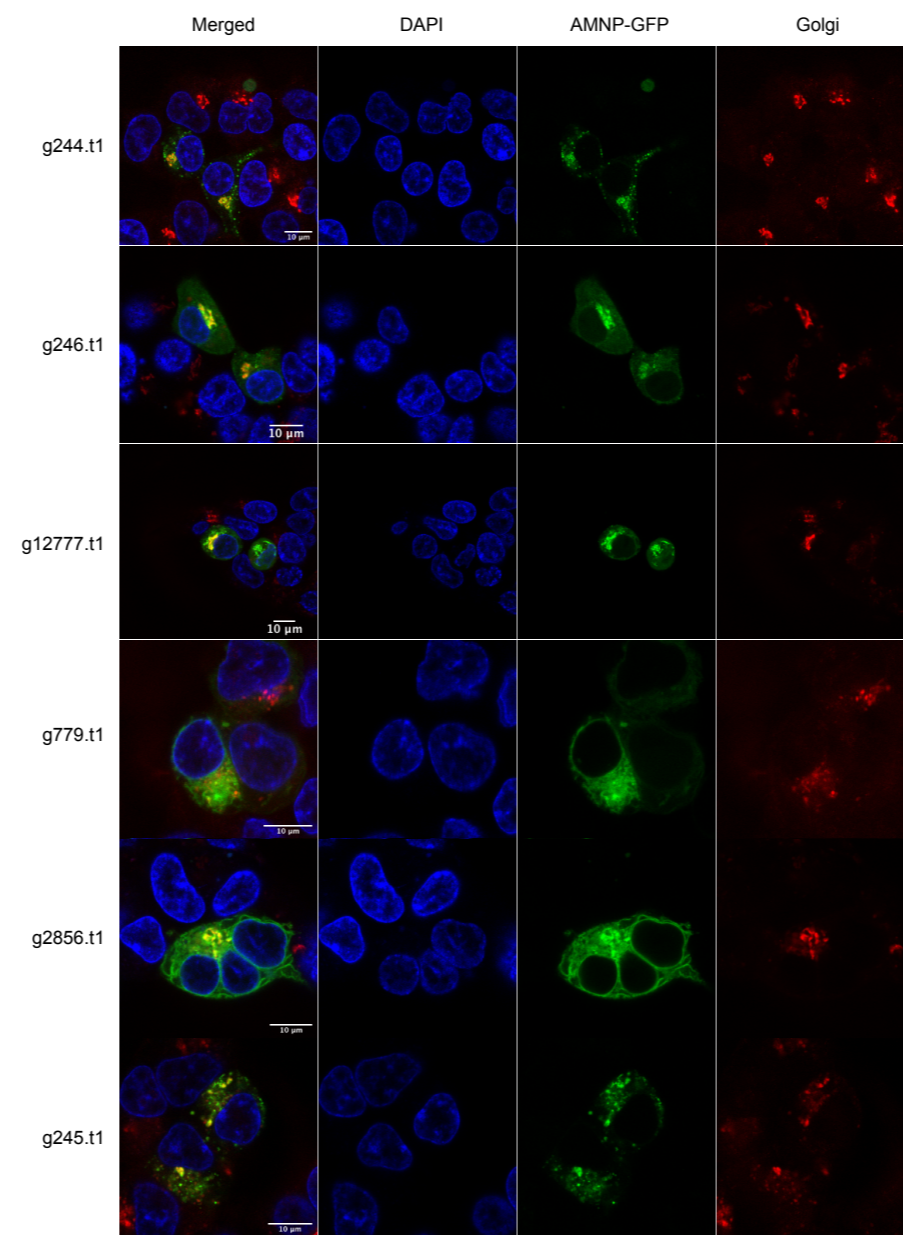

**S27 Fig**
